# Supplementary material for: Genome-wide profiling of 5-hydroxymethylcytosines in circulating cell-free DNA reveals population-specific pathways in the development of multiple myeloma
Source: J Hematol Oncol. 2022 Aug 16;15:106. doi: 10.1186/s13045-022-01327-y (PMC9380317; doi:10.1186/s13045-022-01327-y)
Supplement: Supplementary file 3 — Additional file 3:. Table S2. Top 500 differentially modified gene bodies between MM and its precursors in the combined samples. Table S3. Enriched KEGG pathways among differentially modified genes between MM and its precursors in the combined samples. Table S4. Top 500 differentially modified gene bodies between AA and EA patients with MM. Table S5. Enriched KEGG pathways among differentially modified genes between EAs and AAs with MM. Table S6. Top 500 differentially modified gene bodies between MM and its precursors in EA patients. Table S7. Top 500 differentially modified gene bodies between MM and its precursors in AA patients. Table S8. Enriched KEGG pathways among differentially modified genes between MM and its precursors in different populations. [file 13045_2022_1327_MOESM3_ESM.xlsx]

## Sheet: Table S2
Table S2. Top 500 differentially modified gene bodies between MM and its precursors in the combined samples.
Symbol	Coefficient	Standard Error	t-value	p-value	FDR
STARD13	0.471177	0.0654664	7.19724	4.02024e-12	5.86352e-08
ZBTB7C	0.858667	0.119394	7.1919	4.15882e-12	6.06523e-08
SYCP2	-0.477282	0.0694061	-6.87665	2.98508e-11	4.35315e-07
FAM19A2	-0.380972	0.0620849	-6.1363	2.37031e-09	3.45639e-05
OLFM3	-0.224034	0.036835	-6.08211	3.21765e-09	4.69166e-05
DCT	-0.486608	0.0814784	-5.97223	5.94176e-09	8.66308e-05
NLGN1	-0.309394	0.0539227	-5.73774	2.13801e-08	0.000311701
ZNF804A	-0.313105	0.054583	-5.73631	2.15446e-08	0.000314077
ARMC8	-0.5834	0.101946	-5.72261	2.31905e-08	0.000338048
IPPK	0.690363	0.121386	5.68735	2.8008e-08	0.000408245
CNTNAP2	-0.352497	0.0626037	-5.63061	3.78761e-08	0.000552045
TRIM66	0.697858	0.124897	5.58747	4.75704e-08	0.000693291
RAI14	0.243242	0.0441261	5.51244	7.04866e-08	0.0010272
FBXL20	-0.937395	0.171551	-5.46423	9.05456e-08	0.00131943
NNMT	0.496817	0.0923545	5.37946	1.40058e-07	0.00204078
CDK14	-0.413219	0.077975	-5.29937	2.10447e-07	0.00306622
NDUFAB1	0.505418	0.095488	5.293	2.17334e-07	0.00316634
NF2	-0.672207	0.127385	-5.27696	2.35643e-07	0.00343285
HTATIP2	0.598981	0.113712	5.26752	2.47115e-07	0.00359973
SF3B3	0.859245	0.163154	5.26647	2.48422e-07	0.00361851
ZNF346	0.75593	0.143939	5.25175	2.67496e-07	0.00389608
TGFBRAP1	-0.893195	0.170151	-5.24943	2.70622e-07	0.00394134
PTPRM	0.226904	0.0433456	5.23477	2.91256e-07	0.00424156
PSMC3	0.45265	0.0868381	5.21257	3.25426e-07	0.00473885
WDR27	0.49945	0.0966615	5.167	4.08177e-07	0.00594347
PTPN14	0.27657	0.0536157	5.15839	4.25973e-07	0.00620216
ATP13A4	-0.266967	0.0519971	-5.13428	4.79842e-07	0.00698602
GPN1	0.534615	0.104262	5.1276	4.95897e-07	0.00721927
RDH16	0.388136	0.0758164	5.11942	5.16252e-07	0.00751508
ST5	0.625041	0.122571	5.09941	5.69561e-07	0.00829053
ATXN7L2	0.40192	0.0790121	5.08681	6.05819e-07	0.0088177
GCN1	0.614272	0.121058	5.07418	6.44409e-07	0.00937872
APOBEC1	-0.503045	0.09957	-5.05217	7.17409e-07	0.0104405
C1RL	-0.585167	0.11587	-5.05021	7.24301e-07	0.01054
IRS2	-0.432606	0.0859919	-5.03077	7.9603e-07	0.011583
STXBP5	-0.350544	0.0696803	-5.03075	7.96107e-07	0.0115834
ZNF385D	-0.191824	0.0381412	-5.02931	8.01691e-07	0.0116638
ERCC3	0.738468	0.146866	5.02817	8.06162e-07	0.011728
NOL9	0.610544	0.12143	5.02793	8.07078e-07	0.0117406
DTYMK	0.477981	0.095578	5.00095	9.19613e-07	0.0133767
DNAJA3	0.618395	0.124052	4.98495	9.93405e-07	0.0144491
HERPUD2	-0.496339	0.0997066	-4.978	1.02719e-06	0.0149395
PCGF2	0.375937	0.0755289	4.97738	1.03023e-06	0.0149826
EIF3K	0.622554	0.125109	4.97609	1.03668e-06	0.0150754
C12orf10	0.417902	0.0840145	4.97416	1.04632e-06	0.0152145
TEKT5	0.441482	0.0887975	4.97179	1.05833e-06	0.0153881
KIAA0907	0.645052	0.130718	4.93469	1.26418e-06	0.0183799
SEMA3C	-0.294341	0.0597214	-4.92856	1.30174e-06	0.0189247
PLCL1	-0.370401	0.0756008	-4.89943	1.49543e-06	0.0217391
PCDH1	0.277315	0.0568094	4.88149	1.62822e-06	0.0236678
NT5C3A	-0.563853	0.11568	-4.87424	1.68509e-06	0.0244928
IQCK	0.498922	0.102647	4.86058	1.79743e-06	0.0261239
RNF130	-0.734602	0.151558	-4.84702	1.91613e-06	0.0278471
PBX3	-0.538298	0.111482	-4.82858	2.08965e-06	0.0303668
TEX15	-0.380496	0.0789254	-4.82095	2.16581e-06	0.0314714
PSMD3	0.453011	0.094604	4.7885	2.52076e-06	0.0366267
SCNN1B	0.407367	0.085429	4.76849	2.7669e-06	0.0402002
RANBP3	0.688804	0.145044	4.74893	3.0298e-06	0.044017
GPC5	-0.241953	0.0510096	-4.74329	3.11003e-06	0.0451795
ACTR5	0.628718	0.13275	4.7361	3.2152e-06	0.0467039
CIRH1A	0.722532	0.15273	4.73079	3.29499e-06	0.0478598
CCDC84	0.607407	0.128525	4.72599	3.36883e-06	0.0489289
MED1	0.541619	0.11465	4.72412	3.398e-06	0.0493491
PLA2G16	0.567695	0.120449	4.71314	3.57444e-06	0.0519081
PUS1	0.462847	0.0982881	4.70908	3.64183e-06	0.0528831
LAP3	0.340287	0.0723018	4.70648	3.68563e-06	0.0535154
SEC11C	0.443102	0.094225	4.70259	3.75215e-06	0.0544774
GINM1	0.670523	0.143001	4.68894	3.99494e-06	0.0579985
ZNF565	0.472692	0.100895	4.68499	4.06789e-06	0.0590535
RAB21	-0.430448	0.0919742	-4.6801	4.16014e-06	0.0603886
EMP2	0.289768	0.0620536	4.66964	4.36398e-06	0.0633432
TRIM9	-0.419118	0.0902926	-4.64178	4.95521e-06	0.07192
DTNA	-0.455788	0.0983736	-4.63324	5.1513e-06	0.0747608
GIMAP5	0.274126	0.0592638	4.62553	5.3348e-06	0.0774186
MDH2	0.432868	0.0937333	4.61808	5.518e-06	0.0800717
PPM1A	-0.410706	0.0890039	-4.61447	5.60903e-06	0.081387
PCNXL4	-0.46578	0.101328	-4.59675	6.07672e-06	0.0881671
GMNN	-0.44867	0.097659	-4.59425	6.14553e-06	0.0891594
TET2	-0.419679	0.0915381	-4.58474	6.41466e-06	0.0930575
KXD1	0.485766	0.105981	4.58352	6.45001e-06	0.0935638
KPNA1	-0.663555	0.144798	-4.58263	6.47606e-06	0.0939353
HMGA2	-0.340433	0.074383	-4.57675	6.64955e-06	0.0964451
SUCLG2	0.265313	0.0581379	4.56351	7.05728e-06	0.102352
COX5A	0.591144	0.129591	4.56161	7.11771e-06	0.103221
STIM1	-0.5575	0.122253	-4.5602	7.1626e-06	0.103865
COG1	0.548545	0.12044	4.5545	7.34804e-06	0.106547
RGS21	-0.276497	0.0607123	-4.55422	7.35726e-06	0.106673
PTH2R	-0.38963	0.0856362	-4.54983	7.50332e-06	0.108783
EIF4G3	-0.459282	0.101286	-4.53453	8.0347e-06	0.116479
RBM46	-0.361053	0.0796291	-4.53419	8.04688e-06	0.116648
INCENP	0.530063	0.116925	4.53335	8.0768e-06	0.117073
LMCD1	0.2606	0.0575195	4.53064	8.17539e-06	0.118494
NAALADL2	-0.248299	0.0548072	-4.53041	8.18346e-06	0.118603
CNTRL	-0.499101	0.110402	-4.52076	8.54315e-06	0.123807
NDRG4	0.331209	0.0732876	4.51931	8.59862e-06	0.124603
CAPN8	0.422227	0.0934842	4.51656	8.70465e-06	0.12613
PROM1	-0.493724	0.109383	-4.51373	8.81464e-06	0.127715
EDC4	0.376115	0.0833883	4.51041	8.94605e-06	0.12961
MMP15	0.289932	0.0643042	4.50876	9.01193e-06	0.130556
CDH9	-0.239213	0.0530568	-4.50862	9.01719e-06	0.130623
ITPRIPL1	0.40197	0.0892845	4.50212	9.28151e-06	0.134443
EVL	-0.800615	0.178021	-4.49731	9.48156e-06	0.137331
GNPTG	0.367709	0.0819021	4.48962	9.81043e-06	0.142084
HRASLS	-0.194597	0.0433773	-4.48616	9.9617e-06	0.144265
SESN3	-0.340591	0.0760663	-4.47756	1.03481e-05	0.14985
FAM171A1	0.326094	0.0729172	4.47211	1.05998e-05	0.153486
NPHS1	0.441244	0.0987095	4.47013	1.06932e-05	0.154826
PRKG2	-0.260917	0.0584184	-4.46636	1.08726e-05	0.157414
TRRAP	0.60636	0.135991	4.45882	1.12395e-05	0.162714
PIGT	0.392043	0.0882543	4.4422	1.2092e-05	0.175044
MKX	-0.279047	0.0628375	-4.44078	1.21676e-05	0.176126
MYO1E	0.517401	0.116575	4.43834	1.22986e-05	0.17801
TRHDE	-0.219626	0.0495299	-4.4342	1.25237e-05	0.181255
MCTP2	-0.325705	0.0735208	-4.43011	1.27503e-05	0.184523
SUCNR1	-0.302899	0.068432	-4.42629	1.29657e-05	0.187627
CLPTM1	0.478289	0.108126	4.42344	1.31285e-05	0.189969
AVIL	0.47652	0.107732	4.42322	1.3141e-05	0.190137
SZT2	0.61288	0.138788	4.41594	1.35656e-05	0.196268
CYP46A1	0.388147	0.0879269	4.41443	1.36557e-05	0.197557
GLTSCR1	0.605216	0.137675	4.39598	1.48001e-05	0.214098
C19orf54	0.459376	0.104738	4.38595	1.54602e-05	0.223632
ARHGAP32	-0.268858	0.0613012	-4.38585	1.54669e-05	0.223713
METTL25	-0.380766	0.0868806	-4.38264	1.56838e-05	0.226835
LRRC55	0.283964	0.0648027	4.38198	1.57289e-05	0.227471
HECW1	-0.474722	0.108452	-4.37726	1.60543e-05	0.232161
ELAC2	0.438531	0.100188	4.37709	1.60663e-05	0.232319
GTPBP4	0.541546	0.123735	4.37666	1.60963e-05	0.232737
AHI1	-0.385399	0.0881583	-4.37167	1.6448e-05	0.237805
FAM102B	-0.315054	0.0720782	-4.37101	1.64954e-05	0.238474
MARCH8	-0.679963	0.155846	-4.36304	1.70749e-05	0.246835
CKAP2L	-0.35791	0.0824267	-4.34216	1.86859e-05	0.270105
HUS1	0.649322	0.150017	4.32832	1.98334e-05	0.286673
GRIP1	-0.313231	0.0724209	-4.32515	2.01055e-05	0.290584
RNF212B	-0.375804	0.0869559	-4.32177	2.0399e-05	0.294806
KMT2C	-0.662499	0.153294	-4.32176	2.04006e-05	0.294809
RNF17	-0.361236	0.0837481	-4.31337	2.11481e-05	0.30559
OTUD7B	0.457994	0.106297	4.30863	2.15823e-05	0.311843
FRMD1	0.201557	0.0467979	4.30697	2.17361e-05	0.314043
SAMD4B	0.42736	0.0993876	4.29993	2.24007e-05	0.323623
NAA11	-0.284721	0.066368	-4.29004	2.33679e-05	0.337573
CRY2	0.426045	0.0993649	4.28769	2.36037e-05	0.340956
AKR1A1	0.552511	0.128887	4.2868	2.36933e-05	0.342226
ABLIM2	0.351832	0.0820783	4.28654	2.37192e-05	0.342576
TTC9	-0.377808	0.088163	-4.28533	2.38416e-05	0.344321
LCOR	-0.613212	0.143171	-4.28306	2.40737e-05	0.347648
TLR5	0.483546	0.11299	4.27956	2.44358e-05	0.352853
TMEM196	-0.312241	0.0729968	-4.27746	2.46555e-05	0.356
POLDIP2	0.335699	0.0785083	4.27596	2.48131e-05	0.358252
CTD-2135J3.4	0.334181	0.078159	4.27566	2.48448e-05	0.358684
TFF3	-0.289898	0.0679037	-4.26925	2.55319e-05	0.368579
TTC26	-0.374447	0.0877143	-4.26894	2.55652e-05	0.369034
DDB2	0.604806	0.141964	4.26029	2.65223e-05	0.382823
RPS5	0.389616	0.0915022	4.258	2.67815e-05	0.386537
ZBED5	-0.463484	0.108955	-4.25389	2.72519e-05	0.393299
TIMM10B.dup	0.478726	0.112582	4.25223	2.74449e-05	0.396058
C1orf54	0.407997	0.0959957	4.25016	2.76862e-05	0.399512
ARHGAP15	-0.22848	0.0537696	-4.24924	2.77949e-05	0.401053
FAM13B	-0.752636	0.177169	-4.24814	2.79247e-05	0.402898
ATF7IP	-0.421642	0.0993772	-4.24284	2.85576e-05	0.412
DOCK9	0.322007	0.0760908	4.23189	2.99111e-05	0.431498
IGFBP2	0.248672	0.0587695	4.23131	2.99842e-05	0.432523
LRAT	-0.315293	0.0745143	-4.23131	2.99846e-05	0.432523
PLA2G3	0.333353	0.0788007	4.23033	3.01085e-05	0.434254
STRN	-0.582509	0.137709	-4.22999	3.01513e-05	0.434843
TACC2	0.247077	0.058413	4.22983	3.01724e-05	0.435116
SCRN1	-0.389724	0.092162	-4.22868	3.0318e-05	0.437186
SESN2	0.566658	0.134061	4.22687	3.0551e-05	0.440514
CDH4	-0.191026	0.0451987	-4.22635	3.06175e-05	0.441443
CRISPLD1	-0.262093	0.0620278	-4.22542	3.07388e-05	0.443161
ACAT2	0.405676	0.0960821	4.22218	3.11607e-05	0.449213
PPM1G	0.673333	0.159487	4.22188	3.12009e-05	0.449761
ZDHHC16	0.478972	0.113482	4.22069	3.13577e-05	0.45199
EPB41L4B	0.29314	0.0694586	4.22036	3.1401e-05	0.452582
HIGD1B	0.450286	0.10674	4.21854	3.16429e-05	0.456038
ZNF619	0.394093	0.0934859	4.21553	3.20455e-05	0.461808
ITGA4	-0.278381	0.0660943	-4.21188	3.25418e-05	0.468927
SLC44A4	0.410468	0.0975685	4.20697	3.32207e-05	0.478678
CYB5R4	-0.389538	0.0926948	-4.20237	3.38681e-05	0.487972
TMEM37	0.339859	0.0809125	4.20033	3.41605e-05	0.49215
CERS6	-0.417702	0.0994571	-4.19982	3.42324e-05	0.493151
PAK6	-0.401792	0.0957269	-4.19727	3.46006e-05	0.498422
AHCTF1	-0.46214	0.110168	-4.19487	3.49514e-05	0.503439
ADAM10	-0.480146	0.114652	-4.18786	3.5992e-05	0.518392
PLAG1	-0.283861	0.067784	-4.18772	3.60134e-05	0.518664
TBC1D23	-0.425202	0.101552	-4.18705	3.61155e-05	0.5201
TMED3	-0.332576	0.0794319	-4.18693	3.61334e-05	0.520321
CYP2A13	0.351233	0.0840483	4.17894	3.73611e-05	0.537963
THAP8	0.542292	0.129779	4.17857	3.7419e-05	0.538758
WDR59	0.588371	0.140855	4.17716	3.76403e-05	0.541907
EIF3I	0.365055	0.0874239	4.17568	3.78727e-05	0.545215
SLC2A9	0.661471	0.158476	4.17395	3.81475e-05	0.549134
PLCL2	-0.397381	0.0952359	-4.1726	3.83637e-05	0.552208
CTNND1	0.361369	0.0867224	4.16697	3.9275e-05	0.565285
PTGDR	-0.253377	0.0608197	-4.16603	3.94298e-05	0.567474
MTMR14	0.716281	0.171937	4.16596	3.94412e-05	0.567598
KHDRBS2	-0.220561	0.0529579	-4.16484	3.96256e-05	0.570212
SLC43A3	-0.35627	0.0855905	-4.16249	4.00142e-05	0.575765
RPS6KA2	-0.356107	0.0855826	-4.16098	4.02679e-05	0.579374
ZNF623	0.549072	0.132029	4.15874	4.06454e-05	0.584765
AKT3	-0.379028	0.0912995	-4.15148	4.18915e-05	0.602651
DGKI	-0.283016	0.0682209	-4.14853	4.24079e-05	0.610038
VCL	-0.432804	0.104349	-4.14766	4.25614e-05	0.612204
MPP7	-0.28233	0.0680998	-4.14583	4.28861e-05	0.61683
ZDHHC12	0.333728	0.0807232	4.13423	4.50002e-05	0.647193
ADAM7	-0.299206	0.0724413	-4.13032	4.57337e-05	0.657697
CDK19	-0.632473	0.153243	-4.12725	4.63191e-05	0.666068
PRDM10	-0.616563	0.1494	-4.12693	4.63801e-05	0.666899
SIGLEC8	-0.327717	0.079516	-4.1214	4.74532e-05	0.682282
TAB2	-0.403431	0.0979063	-4.12058	4.76132e-05	0.684536
MYEOV2	0.395714	0.0961042	4.11755	4.82135e-05	0.693117
APPL1	-0.570262	0.138503	-4.11732	4.82597e-05	0.693733
EXOSC7	0.442287	0.107451	4.11617	4.84887e-05	0.696977
KCNA2	-0.286007	0.0695839	-4.11025	4.96877e-05	0.714162
SESN1	-0.492457	0.119813	-4.11021	4.96964e-05	0.714237
FGF5	-0.327642	0.0797276	-4.10951	4.9839e-05	0.716236
RP11-101E3.5	0.349646	0.0851221	4.10758	5.02364e-05	0.721897
RNF40	0.402795	0.0980766	4.10694	5.03695e-05	0.72376
RANBP9	-0.3653	0.0889647	-4.10612	5.05405e-05	0.726166
TLCD2	0.371079	0.0903793	4.1058	5.06081e-05	0.727086
LHX3	0.272148	0.0662916	4.10532	5.07082e-05	0.728475
TMEM65	-0.378788	0.0923726	-4.10065	5.16921e-05	0.742556
PAN3	-0.507588	0.123796	-4.10019	5.17905e-05	0.743918
ABCA4	0.726985	0.177403	4.09794	5.2272e-05	0.750783
AMD1	-0.459608	0.112168	-4.0975	5.23662e-05	0.752084
PMPCA	0.346646	0.0847441	4.09051	5.38932e-05	0.77396
C16orf62	0.743001	0.181672	4.0898	5.40504e-05	0.776163
BAG3	0.370699	0.0907735	4.08378	5.54019e-05	0.795516
GHRHR	0.376687	0.0922814	4.08194	5.58206e-05	0.801473
LHX2	0.383728	0.094049	4.08009	5.62462e-05	0.807526
DCDC2	-0.236608	0.0580199	-4.07805	5.67184e-05	0.814249
IL26	-0.319947	0.0784899	-4.07628	5.71312e-05	0.820119
MGMT	0.331945	0.0814941	4.07323	5.78477e-05	0.830346
FRMD4A	0.40094	0.0984454	4.07271	5.79719e-05	0.83207
APBB2	0.277979	0.0683176	4.06893	5.88766e-05	0.844997
ITGB3BP	-0.413285	0.101669	-4.06501	5.98259e-05	0.858562
MGAT4D	-0.388696	0.0956687	-4.06294	6.03339e-05	0.865791
KLF15	0.342271	0.0843161	4.05939	6.12164e-05	0.878394
PYGL	-0.317439	0.0782141	-4.05859	6.14152e-05	0.881185
STAM	-0.397013	0.0978346	-4.058	6.15624e-05	0.883236
LRFN3	0.275331	0.0679122	4.05423	6.25188e-05	0.896894
MAP9	-0.312147	0.0770293	-4.05232	6.30059e-05	0.90382
AARS	0.44555	0.109952	4.05224	6.30275e-05	0.904066
GRWD1	0.339526	0.0837881	4.0522	6.30363e-05	0.904129
SLAIN1	-0.263093	0.0649475	-4.05086	6.33835e-05	0.909046
ACO2	0.568252	0.140598	4.04169	6.57926e-05	0.943531
PEX7	-0.438965	0.108728	-4.03729	6.69813e-05	0.960512
PKP2	-0.257526	0.0638185	-4.03529	6.75284e-05	0.968289
AAMDC	0.496613	0.123153	4.0325	6.82978e-05	0.979255
TTC16	0.374114	0.0928014	4.03134	6.86178e-05	0.983774
PRKCE	0.456109	0.113232	4.02808	6.95326e-05	0.99682
CEACAM19	0.374279	0.0929335	4.02738	6.97304e-05	0.999586
MMP26	-0.249469	0.0620018	-4.02357	7.08144e-05	1
CYP26C1	0.265844	0.0660876	4.0226	7.10939e-05	1
TRPC1	-0.354069	0.0880405	-4.02166	7.13649e-05	1
MYCBP2	-0.485112	0.120673	-4.02005	7.18326e-05	1
GTDC1	-0.293738	0.073113	-4.01759	7.25519e-05	1
ZFYVE9	0.439535	0.10956	4.01183	7.42631e-05	1
DACH1	-0.225532	0.0562416	-4.01006	7.47953e-05	1
HNRNPLL	-0.297602	0.074219	-4.00978	7.48787e-05	1
AOAH	-0.318127	0.079372	-4.00805	7.54038e-05	1
SMPD4	0.415237	0.103603	4.00798	7.54262e-05	1
KIAA1033	-0.384349	0.0959887	-4.00411	7.66152e-05	1
TCN2	0.429524	0.107341	4.00149	7.74271e-05	1
MAP4K5	-0.390134	0.0975112	-4.00091	7.76091e-05	1
ZNRF2	-0.327603	0.0819084	-3.99963	7.80112e-05	1
PELI2	-0.307687	0.0769407	-3.99902	7.82033e-05	1
RGS18	-0.212516	0.0531899	-3.99542	7.93473e-05	1
RBM11	-0.212137	0.0531039	-3.99476	7.95577e-05	1
CETN3	-0.300938	0.075347	-3.99402	7.97942e-05	1
C8orf88	-0.282272	0.0707211	-3.99134	8.06605e-05	1
CSRNP2	0.513451	0.128738	3.98835	8.16367e-05	1
KRTAP9-9	-0.290842	0.0729543	-3.98663	8.22043e-05	1
ANKRD12	-0.378147	0.0948716	-3.98588	8.24536e-05	1
ATP6V0A2	-0.383744	0.0963083	-3.98453	8.29008e-05	1
GPD2	-0.355494	0.0893006	-3.98087	8.41319e-05	1
SUGP1	0.41074	0.103181	3.98078	8.41597e-05	1
PHAX	0.438303	0.110146	3.97929	8.46658e-05	1
MACC1	-0.253699	0.0637649	-3.97866	8.48821e-05	1
HSPB8	0.220654	0.0554743	3.97758	8.52486e-05	1
MRPL15	0.392524	0.0987175	3.97624	8.57095e-05	1
NOVA2	0.247999	0.0623777	3.97577	8.58722e-05	1
ADAMTS17	0.167512	0.0421349	3.97561	8.59262e-05	1
METTL2B	0.459479	0.11561	3.97437	8.63536e-05	1
PIK3C3	-0.319241	0.0803634	-3.97247	8.70161e-05	1
ST8SIA4	-0.247299	0.0622953	-3.96979	8.79548e-05	1
ATOH8	0.297378	0.07494	3.96822	8.85108e-05	1
DIXDC1	0.564715	0.142316	3.96803	8.85778e-05	1
DSC2	0.196733	0.0496212	3.9647	8.97666e-05	1
RIPK2	-0.334664	0.0844753	-3.96168	9.08596e-05	1
DARS	-0.327443	0.0827269	-3.95812	9.2164e-05	1
RSBN1	-0.38506	0.0973348	-3.95603	9.29341e-05	1
CCNH	-0.384884	0.0973069	-3.95537	9.31821e-05	1
VAMP3	-0.36623	0.0926125	-3.95443	9.35312e-05	1
SLC12A4	0.349969	0.0886073	3.94967	9.53275e-05	1
TAOK2	0.358237	0.0907997	3.94536	9.69818e-05	1
CTDSPL	-0.44958	0.113964	-3.94494	9.71411e-05	1
ZDHHC2	-0.394424	0.100037	-3.94278	9.79834e-05	1
COL24A1	-0.24238	0.0615045	-3.94085	9.87414e-05	1
ECSIT	0.426316	0.108238	3.93869	9.95939e-05	1
XPC	0.482996	0.122724	3.93562	0.000100819	1
NBEA	-0.281742	0.0716024	-3.93482	0.000101141	1
ETNK1	-0.295987	0.0752535	-3.9332	0.000101793	1
CYB5A	0.468969	0.119266	3.93212	0.00010223	1
LRRC8D	-0.308807	0.0786066	-3.92851	0.00010371	1
TUBB6	0.381424	0.097117	3.92747	0.000104138	1
AMPD1	-0.355939	0.0906364	-3.92711	0.00010429	1
JARID2	-0.451427	0.114985	-3.92597	0.000104763	1
PHF21A	-0.610186	0.155495	-3.92415	0.00010552	1
TPST1	-0.524917	0.133869	-3.92113	0.000106793	1
MANEAL	0.363512	0.0927154	3.92073	0.000106964	1
ZNF34	0.408304	0.104223	3.91762	0.000108291	1
PGM2L1	-0.413448	0.105582	-3.9159	0.00010903	1
PTBP2	-0.41302	0.105514	-3.91436	0.000109701	1
MYH14	0.218204	0.055759	3.91334	0.000110145	1
BIRC6	-0.517354	0.132237	-3.91234	0.000110582	1
PALB2	0.454096	0.11607	3.91224	0.000110624	1
TSGA10	-0.352633	0.0901403	-3.91204	0.000110711	1
MMP19	0.377351	0.0964929	3.91066	0.000111318	1
ZNF454	0.28495	0.0728866	3.9095	0.00011183	1
NOB1	0.376942	0.0964307	3.90894	0.000112079	1
PIK3CG	-0.287629	0.0735836	-3.90887	0.000112111	1
TIMM44	0.296181	0.0757836	3.90825	0.000112388	1
FOLR1	0.369061	0.094508	3.90508	0.000113806	1
CRISP3	-0.165695	0.0424545	-3.90289	0.000114797	1
RYBP	-0.362318	0.0928451	-3.90239	0.000115021	1
SLC17A8	0.330904	0.084964	3.89464	0.000118599	1
UBXN10	0.27659	0.071182	3.88568	0.000122862	1
ANLN	-0.329405	0.0847868	-3.8851	0.000123145	1
UBE2Q1	0.404018	0.104026	3.88383	0.000123761	1
INTS9	-0.669751	0.172647	-3.87931	0.000125983	1
TMC7	0.347291	0.0895913	3.87639	0.000127438	1
SOX13	0.22915	0.0591285	3.87547	0.0001279	1
HS3ST5	-0.206444	0.0533028	-3.87304	0.000129125	1
LRRFIP2	-0.475967	0.122897	-3.8729	0.000129199	1
SRPK2	-0.636248	0.164432	-3.86938	0.000130998	1
PLEKHF2	-0.296939	0.0768627	-3.86324	0.000134187	1
MTERF1	-0.375979	0.0973677	-3.86144	0.000135141	1
KIAA0141	0.393333	0.101927	3.85897	0.000136454	1
DENND2C	-0.266668	0.0691228	-3.85789	0.000137035	1
PRKACB	-0.291431	0.0755663	-3.85663	0.000137712	1
SLC12A9	0.349439	0.0908516	3.84626	0.000143408	1
LARP4	0.5601	0.145659	3.84527	0.000143967	1
TBC1D5	-0.400701	0.104208	-3.8452	0.000144003	1
STAT2	0.337917	0.0879157	3.84365	0.000144878	1
TUBG2	0.328164	0.0854993	3.8382	0.000147991	1
ABI1	-0.349165	0.0910282	-3.83579	0.000149392	1
MAPRE3	0.429036	0.111861	3.83545	0.000149586	1
RP11-166N6.3	-0.26958	0.0702909	-3.83521	0.00014973	1
AGAP1	0.20027	0.0522501	3.83292	0.000151072	1
ATP2C1	-0.27895	0.0728008	-3.83169	0.000151799	1
FAM219A	0.388418	0.101423	3.82969	0.000152983	1
PLLP	0.465085	0.12158	3.82535	0.000155589	1
NEIL3	-0.300447	0.0785718	-3.82386	0.000156494	1
ADAMTSL1	0.178252	0.0466248	3.82312	0.000156942	1
SNX9	0.720802	0.188647	3.8209	0.000158303	1
NOL3	0.336013	0.0879442	3.82075	0.000158395	1
RFC5	0.410467	0.107432	3.8207	0.000158425	1
CENPU	-0.377368	0.0988116	-3.81906	0.000159437	1
SCGB2B2	0.209057	0.0547674	3.81718	0.00016061	1
ANKRD10	-0.444787	0.116554	-3.81616	0.000161246	1
MAN2C1	0.34573	0.0906242	3.81498	0.000161982	1
IQUB	-0.313832	0.0823	-3.81326	0.000163068	1
ZNF264	0.404802	0.106164	3.81298	0.000163245	1
IL5RA	-0.317141	0.0832438	-3.80978	0.000165283	1
CDAN1	0.327057	0.085889	3.8079	0.000166491	1
MYO1B	0.237569	0.0623942	3.80755	0.000166722	1
RP11-286N22.8	0.567291	0.149124	3.80415	0.000168927	1
PTCHD3	-0.348397	0.0916267	-3.80235	0.000170112	1
ITGA7	0.388041	0.102062	3.80201	0.000170333	1
MVB12A	0.374858	0.0986145	3.80124	0.00017084	1
NQO1	0.46352	0.122069	3.7972	0.000173531	1
RTKN2	-0.294463	0.0775522	-3.79697	0.000173689	1
ZDHHC5	0.560949	0.147742	3.79681	0.000173795	1
PPP1R12A	-0.305696	0.0805823	-3.79359	0.000175971	1
MBTD1	-0.548607	0.144639	-3.79293	0.000176422	1
RTN4	-0.308388	0.081332	-3.79172	0.000177249	1
ARFGEF1	-0.459401	0.121197	-3.79052	0.000178071	1
TMPRSS15	-0.261395	0.0690193	-3.78728	0.000180313	1
BCL2L11	0.428717	0.113212	3.78686	0.0001806	1
BMPR1B	-0.280732	0.0741624	-3.78538	0.000181641	1
TOP3B	0.390723	0.103309	3.78208	0.000183965	1
WNT9B	0.433385	0.114607	3.78149	0.000184381	1
STX4	0.359698	0.0951382	3.78079	0.000184877	1
NCAPH2	0.317732	0.0840742	3.77919	0.000186024	1
RASGRP1	-0.25098	0.06642	-3.77868	0.000186387	1
INSIG2	-0.251948	0.0667308	-3.7756	0.000188614	1
TMEM161A	0.30281	0.0803336	3.7694	0.000193164	1
CCDC144NL	-0.329553	0.0874376	-3.76901	0.000193455	1
DENND1B	-0.327133	0.0868183	-3.76802	0.000194188	1
SPPL3	-0.582808	0.154673	-3.768	0.000194207	1
CLINT1	-0.408954	0.108651	-3.76392	0.000197271	1
GTF2B	-0.453471	0.120546	-3.7618	0.000198881	1
EBI3	0.345468	0.0918502	3.76121	0.000199336	1
SLMAP	-0.62927	0.167681	-3.75279	0.000205873	1
HIF3A	0.301258	0.0803149	3.75096	0.00020732	1
TKFC	0.350774	0.0935306	3.75036	0.000207796	1
HDAC1	0.583492	0.155614	3.74962	0.000208386	1
GAPT	-0.234846	0.0626466	-3.74875	0.000209084	1
CAPN2	0.531792	0.141894	3.7478	0.000209841	1
XYLB	0.398702	0.106478	3.74446	0.000212541	1
CBLN2	-0.271206	0.0724403	-3.74385	0.000213032	1
CSF1	0.333887	0.0891975	3.74323	0.000213542	1
RBM4	0.545035	0.145625	3.74274	0.000213941	1
FMO2	0.212268	0.0567318	3.7416	0.000214873	1
PIP4K2A	-0.364431	0.0974211	-3.74078	0.000215548	1
C4orf22	-0.209827	0.0561117	-3.73944	0.00021665	1
CEP41	-0.352127	0.0941897	-3.73849	0.000217443	1
ADAMTS14	0.386674	0.103452	3.73771	0.000218092	1
PDCD4	-0.251427	0.0673145	-3.7351	0.000220269	1
TCOF1	0.450973	0.120797	3.73332	0.000221776	1
XYLT1	-0.24923	0.066849	-3.72826	0.000226094	1
RP11-475E11.9	-0.304337	0.0816372	-3.72792	0.000226385	1
UBE2U	-0.285641	0.0766229	-3.72787	0.000226423	1
UBE2L6	0.373421	0.1002	3.72675	0.000227395	1
ADD3	-0.320112	0.0858992	-3.72659	0.00022753	1
SMLR1	0.331173	0.0889083	3.72489	0.000229011	1
DEPDC1	-0.271621	0.0729291	-3.72446	0.000229387	1
TIAM1	0.325139	0.0873013	3.72433	0.000229495	1
DPP3	0.417361	0.112108	3.72283	0.00023081	1
SRRM4	0.245223	0.0658747	3.72257	0.000231042	1
HNRNPF	-0.410991	0.110406	-3.72254	0.000231066	1
MCU	-0.280292	0.0753027	-3.72221	0.000231359	1
RAB10	-0.406622	0.109271	-3.72123	0.00023222	1
PARP11	-0.418627	0.112508	-3.72088	0.000232532	1
DCAF5	-0.407288	0.109468	-3.72063	0.000232754	1
TNS4	0.360448	0.0968946	3.72	0.000233311	1
LONP1	0.283592	0.0763323	3.71522	0.000237583	1
NXN	0.338063	0.0911381	3.70935	0.000242939	1
MOB3B	0.339668	0.0915754	3.70916	0.000243113	1
HACD4	-0.258031	0.0695923	-3.70775	0.000244423	1
RNF6	-0.551496	0.148779	-3.70682	0.000245286	1
RANBP17	-0.333592	0.0900478	-3.70461	0.000247344	1
PKN2	-0.366082	0.0988736	-3.70252	0.000249312	1
OGDHL	0.23253	0.0628432	3.70016	0.000251547	1
COPG1	0.552307	0.149286	3.69966	0.000252026	1
STAM2	-0.441006	0.119266	-3.69765	0.000253947	1
SLC25A12	-0.564259	0.152601	-3.69761	0.000253989	1
NIPBL	-0.332129	0.0898639	-3.69591	0.000255629	1
TEX2	-0.523684	0.141709	-3.69548	0.000256042	1
FCER1A	-0.248139	0.0671769	-3.69382	0.000257661	1
ARNT2	-0.426226	0.1154	-3.69347	0.000258001	1
SLC6A2	0.347035	0.0940109	3.69143	0.000259993	1
CCDC62	-0.436603	0.118285	-3.6911	0.000260315	1
LAD1	0.257682	0.0698173	3.6908	0.000260616	1
IFI27	0.29301	0.0793956	3.69051	0.000260901	1
RNF165	0.274176	0.0743258	3.68884	0.000262549	1
CTC-360G5.8	0.284893	0.0773174	3.68472	0.000266667	1
KLK15	0.314852	0.085464	3.68402	0.000267366	1
MCC	0.208667	0.0566699	3.68214	0.000269273	1
SBSPON	-0.416544	0.113136	-3.6818	0.000269621	1
MAP3K5	-0.384464	0.104466	-3.68027	0.000271183	1
KPTN	0.34858	0.0947366	3.67946	0.000272004	1
KLHL1	-0.219933	0.0597789	-3.67911	0.000272365	1
B4GALT6	-0.387608	0.1054	-3.67749	0.000274033	1
TBX2	0.209002	0.0568571	3.67593	0.000275652	1
DAPP1	-0.240847	0.0655228	-3.67578	0.000275804	1
MAGI1	0.125916	0.0342874	3.67235	0.000279385	1
MYO5A	-0.376487	0.102523	-3.6722	0.000279542	1
MDM1	-0.284205	0.0773988	-3.67196	0.000279798	1
USP1	-0.369078	0.100538	-3.67104	0.000280773	1
ENTHD1	-0.218043	0.0594011	-3.67068	0.000281148	1
CR1	-0.290548	0.0791584	-3.67046	0.000281378	1
EXT1	0.2838	0.0773274	3.67011	0.00028175	1
INTS8	-0.590067	0.160792	-3.66975	0.000282133	1
ACAD10	0.520015	0.141739	3.66882	0.000283126	1
HYDIN	0.270252	0.0736685	3.66849	0.000283471	1
RFX3	-0.283208	0.0772485	-3.66619	0.000285934	1
RASA1	-0.347175	0.094732	-3.66482	0.000287413	1
SS18L1	0.313158	0.0854769	3.66365	0.000288674	1
SLC25A23	0.375805	0.102584	3.66337	0.000288976	1
GALNT7	-0.293631	0.0801631	-3.66292	0.000289472	1
PTGFRN	0.416889	0.113963	3.65812	0.000294726	1
PUF60	0.289433	0.0791383	3.6573	0.000295638	1
AFTPH	-0.416301	0.113884	-3.6555	0.00029764	1
MRPL4	0.347374	0.0950316	3.65536	0.0002978	1
MTPN	-0.305105	0.0835628	-3.65121	0.000302468	1
KIAA0232	-0.555764	0.152244	-3.65048	0.000303289	1
PLEKHG1	0.249515	0.0684324	3.64615	0.000308247	1
CFAP61	-0.299624	0.0821933	-3.64536	0.000309162	1
CCDC130	0.416168	0.114255	3.64246	0.000312525	1
RP11-330H6.5	0.350607	0.0962851	3.64135	0.000313831	1
KIF25	0.160889	0.0441839	3.64133	0.000313845	1
CTC-432M15.3	-0.200327	0.0550294	-3.64037	0.000314977	1
ERG	-0.257146	0.0706392	-3.64027	0.000315092	1
VNN3	-0.207402	0.0570322	-3.63658	0.000319471	1
SSBP2	-0.271271	0.0746643	-3.63321	0.000323511	1
ATP8B1	0.373515	0.102808	3.63312	0.000323615	1
SESTD1	-0.34591	0.0952482	-3.63167	0.000325379	1
KIF23	-0.262439	0.0722759	-3.63108	0.000326095	1
LMLN	-0.31515	0.0868034	-3.63061	0.000326658	1
ARHGAP24	-0.246556	0.0679249	-3.62983	0.000327615	1
PSKH1	0.402603	0.110979	3.62773	0.000330182	1
ZMIZ2	0.358708	0.0988939	3.6272	0.000330835	1
TMUB2	0.328287	0.0905082	3.62715	0.000330896	1
SDCCAG8	-0.570802	0.157467	-3.62489	0.000333692	1
OR7A5	-0.311351	0.0859088	-3.6242	0.000334557	1
PC	0.335447	0.0926073	3.62226	0.000336986	1
HIST2H2BF	-0.371162	0.102509	-3.62076	0.000338862	1
TTC8	-0.301362	0.083252	-3.61988	0.00033998	1
PLD2	0.349194	0.0965325	3.61737	0.000343165	1

## Sheet: Table S3
Table S3. Enriched KEGG pathways among differentially modified genes between MM and its precursors in the combined samples.
KEGG ID	Description	Count	p-value	Adjusted p-value	Symbol
hsa00020	Citrate cycle (TCA cycle)	5	0.000737841	0.00811625	MDH2/SUCLG2/ACO2/OGDHL/PC
hsa03420	Nucleotide excision repair	5	0.00566856	0.0566856	ERCC3/DDB2/CCNH/XPC/RFC5
hsa04211	Longevity regulating pathway	7	0.00614422	0.0566856	IRS2/SESN3/SESN2/SESN2/AKT3/AKT3/APPL1/SESN1/PRKACB
hsa00534	Glycosaminoglycan biosynthesis - heparan sulfate / heparin	3	0.0202579	0.162063	HS3ST5/XYLT1/XYLT1/EXT1
hsa01200	Carbon metabolism	7	0.0229944	0.162063	MDH2/SUCLG2/ACAT2/ACO2/TKFC/OGDHL/PC
hsa00620	Pyruvate metabolism	4	0.0277662	0.166597	MDH2/AKR1A1/ACAT2/PC
hsa04611	Platelet activation	7	0.0329273	0.166597	STIM1/PRKG2/AKT3/AKT3/PIK3CG/PRKACB/PPP1R12A/RASGRP1
hsa00562	Inositol phosphate metabolism	5	0.0333683	0.166597	IPPK/MTMR14/PIK3C3/PIK3CG/PIP4K2A
hsa00630	Glyoxylate and dicarboxylate metabolism	3	0.0365166	0.166597	MDH2/ACAT2/ACO2
hsa04923	Regulation of lipolysis in adipocytes	4	0.048309	0.166597	IRS2/PRKG2/AKT3/AKT3/PRKACB
hsa05202	Transcriptional misregulation in cancer	9	0.0483534	0.166597	CDK14/PBX3/HMGA2/PROM1/DDB2/HDAC1/ARNT2/SS18L1/ERG

## Sheet: Table S4
Table S4. Top 500 differentially modified gene bodies between AA and EA patients with MM.
Symbol	Coefficient	Standard Error	t-value	p-value	FDR
GTF2IRD2	0.788784	0.0819217	9.62851	3.20335e-19	4.67209e-15
DAP3	-1.63813	0.173131	-9.46181	1.08903e-18	1.58824e-14
TBC1D3C	0.44898	0.0524285	8.56366	6.53294e-16	9.52698e-12
KANSL1	-0.717792	0.0850242	-8.44221	1.50976e-15	2.20153e-11
CBLN2	0.729432	0.0873648	8.34926	2.85279e-15	4.15965e-11
SDHA	-1.17768	0.142204	-8.28163	4.52114e-15	6.59182e-11
TBC1D3	0.670661	0.081694	8.20943	7.37343e-15	1.07497e-10
NOMO3	-0.506041	0.0618937	-8.17597	9.24165e-15	1.34725e-10
RYR3	0.659636	0.0837899	7.8725	6.98374e-14	1.01802e-09
RBM20	1.73443	0.22822	7.59981	4.12769e-13	6.01652e-09
EFCAB2	1.32653	0.181203	7.32072	2.44022e-12	3.55662e-08
REEP1	1.01599	0.138998	7.30939	2.6203e-12	3.81882e-08
SERGEF	1.12248	0.153832	7.29684	2.83521e-12	4.13175e-08
RASA4B	0.486803	0.0679265	7.16661	6.38921e-12	9.31035e-08
NYAP2	0.693881	0.0968661	7.1633	6.52161e-12	9.50264e-08
PTPRM	-0.415862	0.0589845	-7.05036	1.30882e-11	1.90695e-07
ST8SIA1	0.950366	0.14112	6.73446	8.8243e-11	1.28561e-06
GAD1	0.788294	0.117368	6.71644	9.82103e-11	1.43073e-06
DYNC1I1	0.659533	0.0982	6.71622	9.83396e-11	1.43251e-06
FHOD3	0.600029	0.0910888	6.5873	2.10294e-10	3.06314e-06
LRRC37A3	-1.00906	0.153596	-6.5696	2.33231e-10	3.39701e-06
SLIT3	0.707091	0.108421	6.5217	3.08364e-10	4.49101e-06
PDCD6	-1.09561	0.168449	-6.50407	3.41617e-10	4.97497e-06
SCN11A	0.599394	0.0921647	6.50351	3.42727e-10	4.9908e-06
GSTM2	0.418947	0.0644818	6.49714	3.55637e-10	5.17843e-06
TLL2	1.3901	0.214673	6.47543	4.03297e-10	5.87201e-06
ARL17B	-0.460616	0.0717033	-6.42392	5.42855e-10	7.90342e-06
DSC2	-0.417927	0.0655798	-6.3728	7.27884e-10	1.05965e-05
CES1	-0.4273	0.0670537	-6.3725	7.2914e-10	1.06141e-05
XIRP2	0.491673	0.0774892	6.34505	8.52892e-10	1.24147e-05
HECTD2	0.776996	0.122603	6.33748	8.90507e-10	1.29613e-05
CABP5	0.402437	0.0635863	6.32899	9.34603e-10	1.36022e-05
SDK2	0.647091	0.102429	6.31744	9.98101e-10	1.45254e-05
PLEC	-0.443379	0.0705138	-6.28783	1.18074e-09	1.71822e-05
GSTM5	0.890907	0.141693	6.28758	1.18245e-09	1.72058e-05
CCDC7.dup	0.676355	0.107586	6.28662	1.18884e-09	1.72977e-05
LIN28A	0.807855	0.129644	6.23134	1.62448e-09	2.36345e-05
FAT2	0.986041	0.158637	6.21571	1.77374e-09	2.58044e-05
EXOC2	1.00304	0.16147	6.21193	1.81186e-09	2.63571e-05
PLA2G4C	0.544441	0.087827	6.19902	1.94798e-09	2.83353e-05
NMNAT3	0.810219	0.130831	6.19284	2.01668e-09	2.93326e-05
EIF2S3L	0.672404	0.108776	6.18156	2.14819e-09	3.12433e-05
FZD3	0.758417	0.123338	6.14911	2.57523e-09	3.74515e-05
KLRC4-KLRK1	0.457811	0.0749246	6.11029	3.19601e-09	4.64764e-05
TMEM176B	-0.563323	0.0927953	-6.07061	3.98151e-09	5.78952e-05
SLC23A2	-1.96185	0.323449	-6.0654	4.09763e-09	5.95795e-05
PRB2	0.622824	0.102746	6.0618	4.17989e-09	6.07715e-05
ARHGEF33	0.933914	0.155079	6.0222	5.19817e-09	7.55711e-05
SLC26A5	0.960235	0.159913	6.00473	5.7211e-09	8.31677e-05
FHDC1	1.0012	0.166937	5.99751	5.95181e-09	8.65155e-05
SIAH3	0.937509	0.156317	5.99749	5.95253e-09	8.65201e-05
PHACTR4	-1.71913	0.287285	-5.98406	6.40625e-09	9.31084e-05
CNGA3	0.75602	0.12672	5.96609	7.06703e-09	0.000102705
GTF2IRD2B	-0.627283	0.105205	-5.96247	7.20777e-09	0.000104743
ADD2	0.999928	0.168078	5.94918	7.74897e-09	0.0001126
COL28A1	0.681857	0.115262	5.91572	9.29356e-09	0.000135035
FER1L6	0.717739	0.121383	5.91304	9.4299e-09	0.000137007
NBPF1	0.536097	0.0908353	5.90186	1.0018e-08	0.000145541
EPB42	0.925143	0.156913	5.89589	1.03468e-08	0.000150308
SULT1A1	0.574513	0.0980172	5.86135	1.24669e-08	0.000181094
CSRP3	0.708861	0.121104	5.85332	1.30172e-08	0.000189075
HKDC1	0.952794	0.162834	5.85131	1.31593e-08	0.000191126
SMIM21	0.458143	0.0783125	5.8502	1.3238e-08	0.000192255
RAB3B	0.791065	0.13533	5.84546	1.35794e-08	0.000197199
PPEF2	0.996818	0.170567	5.84413	1.36768e-08	0.0001986
INTS9	1.35179	0.232398	5.81669	1.58449e-08	0.000230068
SGCG	0.638836	0.110524	5.78007	1.92689e-08	0.000279765
ERICH6B	0.957638	0.166579	5.74885	2.27483e-08	0.00033026
ZNF814	-0.723336	0.126003	-5.7406	2.37666e-08	0.00034502
EGFLAM	0.956002	0.167027	5.72363	2.60021e-08	0.000377447
LDLRAD3	0.593292	0.103736	5.71924	2.6613e-08	0.000386288
PTPN9	-1.16902	0.204412	-5.71897	2.66507e-08	0.000386808
CPLX4	0.832882	0.145701	5.71637	2.70195e-08	0.000392134
C18orf42	0.575779	0.100839	5.7099	2.79582e-08	0.00040573
ANKRD36B	0.340454	0.059649	5.70763	2.82958e-08	0.0004106
DNTT	0.738479	0.12965	5.69596	3.00922e-08	0.000436638
HPSE2	0.570788	0.1003	5.69081	3.092e-08	0.000448618
KCNIP4	0.453651	0.0798629	5.68037	3.26668e-08	0.00047393
CHST6	1.00146	0.176868	5.66217	3.5945e-08	0.000521454
NBEA	0.545934	0.0965449	5.65471	3.73794e-08	0.000542226
DDX51	-0.589845	0.104342	-5.65299	3.77195e-08	0.000547121
CHRM3	0.551589	0.0977179	5.64471	3.93904e-08	0.000571319
KIAA1217	-0.398744	0.0706806	-5.64149	4.00601e-08	0.000580992
QRICH1	-0.928024	0.164763	-5.63248	4.19924e-08	0.000608974
EYA2	-0.754454	0.134258	-5.61942	4.49574e-08	0.000651927
EP400NL	-0.868828	0.155141	-5.60023	4.96862e-08	0.00072045
DUSP22	0.442057	0.0789367	5.60015	4.97073e-08	0.000720707
PCNXL4	0.788048	0.140853	5.59482	5.11055e-08	0.000740928
SBSPON	0.879593	0.157325	5.59094	5.21476e-08	0.000755984
SEMA5B	0.859573	0.153859	5.58676	5.32912e-08	0.00077251
SH3D19	-0.465961	0.0834639	-5.58279	5.44028e-08	0.000788569
GYPA	0.458887	0.08227	5.57782	5.58227e-08	0.000809094
CHCHD6	0.545259	0.0981249	5.55679	6.22519e-08	0.000902217
MOBP	0.482622	0.0869558	5.5502	6.44114e-08	0.000933451
NBPF3	0.564438	0.101895	5.53942	6.80998e-08	0.000986835
SLIT1	1.09258	0.19755	5.53065	7.12491e-08	0.0010324
LMNTD1	0.86331	0.157356	5.48635	8.94757e-08	0.00129641
RNF17	0.620063	0.113382	5.46878	9.78944e-08	0.00141829
PQLC1	-0.656376	0.120032	-5.46836	9.81037e-08	0.00142123
PDE6A	0.826425	0.151156	5.46735	9.86125e-08	0.0014285
CKAP2	0.703906	0.128805	5.46488	9.98652e-08	0.00144655
SLC1A6	0.649481	0.119404	5.43936	1.13752e-07	0.00164758
LRP2	0.603578	0.112149	5.38195	1.52195e-07	0.00220424
RSU1	0.481096	0.0896831	5.3644	1.66282e-07	0.00240809
FAM184B	0.921625	0.171868	5.36241	1.67963e-07	0.00243227
BEST3	0.564131	0.105222	5.36134	1.6887e-07	0.00244523
MYDGF	-0.739731	0.137987	-5.36086	1.69273e-07	0.00245091
LAMP1	-0.786416	0.147305	-5.33869	1.89232e-07	0.0027397
KCNS3	0.448985	0.0841105	5.33804	1.89855e-07	0.00274852
WIPF2	-1.42624	0.267951	-5.32278	2.0495e-07	0.00296686
CTD-2583A14.9	-0.564926	0.10616	-5.32148	2.06296e-07	0.00298614
GATSL1	-0.60626	0.113934	-5.32114	2.06648e-07	0.00299102
HECW1	0.800547	0.150838	5.30732	2.21432e-07	0.00320478
MCTP2	0.535903	0.101135	5.29891	2.30939e-07	0.00334215
UPP2	0.876672	0.165465	5.29823	2.31715e-07	0.00335315
PTCH1	0.5038	0.0953043	5.28623	2.46013e-07	0.00355981
SNX24	0.501844	0.0949372	5.28607	2.46212e-07	0.00356244
XBP1	0.619337	0.117343	5.278	2.56308e-07	0.00370827
SCIN	0.651799	0.123595	5.27366	2.61891e-07	0.00378878
FRAS1	0.503143	0.0954342	5.27215	2.63876e-07	0.00381723
CLIC6	0.495087	0.0939166	5.27156	2.6465e-07	0.00382816
PPP1R9A	0.530813	0.100769	5.26762	2.69875e-07	0.00390348
FANK1	0.714288	0.13572	5.26297	2.76192e-07	0.00399457
EDDM3A	0.590194	0.1122	5.26017	2.80048e-07	0.00405006
CCS	-0.675894	0.128574	-5.25685	2.84705e-07	0.00411712
ADAM23	0.526015	0.100173	5.25107	2.92986e-07	0.00423658
XKR6	0.737541	0.140554	5.2474	2.98369e-07	0.00431412
FBLN5	0.852114	0.162611	5.24019	3.09201e-07	0.00447044
SLC4A8	0.667593	0.127651	5.22983	3.2546e-07	0.00470518
ZNF586	-0.675258	0.129301	-5.22239	3.37638e-07	0.00488089
ACACB	-0.709058	0.135906	-5.21725	3.46318e-07	0.00500602
RIMBP2	0.346306	0.0664099	5.21468	3.50745e-07	0.00506967
SLC14A2	0.845799	0.162231	5.21355	3.52695e-07	0.00509749
SCAP	-1.20128	0.230719	-5.20669	3.6482e-07	0.00527237
CFAP77	0.755518	0.145137	5.20555	3.66874e-07	0.0053017
CEP41	0.673809	0.129469	5.20442	3.68927e-07	0.005331
FBXW8	1.17212	0.225305	5.20236	3.72681e-07	0.00538486
AMPH	0.677629	0.130326	5.19951	3.77953e-07	0.00546066
GPA33	0.700328	0.134755	5.19705	3.82551e-07	0.00552671
PRIMA1	0.4218	0.0811865	5.19544	3.85584e-07	0.00557014
RSPO2	0.548525	0.105825	5.18332	4.09244e-07	0.00591154
DZANK1	1.13891	0.219962	5.17776	4.20572e-07	0.00607475
SEC23A	-1.04461	0.202129	-5.16803	4.41094e-07	0.00637073
DOCK10	0.5554	0.10759	5.16218	4.5391e-07	0.00655536
FBXO48	0.661809	0.128206	5.16207	4.5417e-07	0.00655866
BSPH1	0.361269	0.0700244	5.15918	4.60628e-07	0.00665146
SMIM14	-0.528964	0.102726	-5.14926	4.83499e-07	0.00698124
PSKH1	-0.796388	0.154808	-5.14436	4.95201e-07	0.00714971
HSD17B3	0.422695	0.082193	5.14271	4.99204e-07	0.007207
TTC9C	-0.79707	0.15505	-5.14071	5.04103e-07	0.00727724
VWA3A	0.770292	0.149922	5.13794	5.10971e-07	0.00737587
CCDC171	0.57972	0.112885	5.13551	5.17053e-07	0.00746315
ZMAT3	0.49332	0.096223	5.12684	5.39357e-07	0.00778454
CRYZ	0.471786	0.0920824	5.12353	5.48122e-07	0.00791049
NXPH2	0.448156	0.0875092	5.12125	5.54221e-07	0.00799796
PRR16	-0.269046	0.0525438	-5.12041	5.56477e-07	0.00802996
CNTNAP2	0.464782	0.0908479	5.11605	5.6841e-07	0.00820159
CFAP61	0.568216	0.111107	5.11416	5.73666e-07	0.00827686
NAV3	0.43287	0.0846619	5.11293	5.77083e-07	0.00832558
TICAM1	-0.606083	0.118747	-5.10399	6.02674e-07	0.00869418
BSPRY	0.802798	0.157605	5.09373	6.33396e-07	0.00913674
RAI14	-0.324543	0.0637493	-5.09093	6.42055e-07	0.00926099
C9orf43	0.616832	0.121206	5.08911	6.47721e-07	0.00934208
SNRPA	-0.677594	0.133301	-5.08317	6.66603e-07	0.00961375
SLC22A1	-0.45353	0.0896852	-5.05691	7.56688e-07	0.0109122
MYO3B	0.689579	0.136608	5.04786	7.90376e-07	0.0113972
KIZ	0.902467	0.179206	5.03592	8.37031e-07	0.0120692
ENOX1	0.610668	0.121346	5.03245	8.51092e-07	0.012271
PHACTR1	0.575473	0.114364	5.03192	8.53232e-07	0.012301
CCDC7	0.762903	0.15166	5.03035	8.59683e-07	0.0123932
TMPRSS15	0.489563	0.0974971	5.02131	8.97748e-07	0.012941
LEF1	0.598662	0.119331	5.01681	9.1732e-07	0.0132222
TRAF5	0.820809	0.163712	5.01374	9.30876e-07	0.0134167
MZT2A	-0.646807	0.129217	-5.00558	9.67931e-07	0.0139498
TACC2	-0.409051	0.0817517	-5.00357	9.77249e-07	0.0140831
PKNOX2	0.706253	0.14121	5.00143	9.87313e-07	0.0142272
CLNK	0.592139	0.11842	5.00034	9.92441e-07	0.0143001
THEGL	0.77693	0.155688	4.99029	1.04121e-06	0.0150018
GLI3	0.499052	0.100084	4.98634	1.061e-06	0.0152858
TMEM74	0.522345	0.104882	4.98034	1.09176e-06	0.0157279
PLEKHM2	-0.772876	0.155216	-4.97935	1.09689e-06	0.0158007
ASB6	-0.501133	0.100646	-4.97915	1.09792e-06	0.0158145
NMD3	0.834362	0.167605	4.97815	1.10316e-06	0.0158888
SS18L1	-0.578085	0.116125	-4.97811	1.10338e-06	0.0158908
ELSPBP1	0.423034	0.0850498	4.97396	1.12537e-06	0.0162065
ST8SIA5	0.422136	0.084922	4.97087	1.14203e-06	0.0164453
CTNND2	0.482112	0.0969882	4.97083	1.14225e-06	0.0164473
E2F7	0.657108	0.132254	4.96854	1.15475e-06	0.0166261
DRD4	-0.43574	0.0877052	-4.96823	1.15643e-06	0.0166491
PTGDR	0.420217	0.0846058	4.96676	1.16453e-06	0.0167645
FAM169B	0.704853	0.141979	4.9645	1.17713e-06	0.0169448
ESR1	-0.369808	0.0744984	-4.96397	1.18006e-06	0.0169858
GNPTG	-0.57893	0.116641	-4.96335	1.18358e-06	0.0170352
ZNF672	-0.73673	0.148679	-4.95517	1.23036e-06	0.0177073
FASLG	0.557011	0.112588	4.94736	1.27679e-06	0.0183742
KLRD1	0.569117	0.115231	4.93893	1.32871e-06	0.0191201
SIM1	0.49491	0.100248	4.93687	1.34171e-06	0.0193058
PLA2G16	-0.842299	0.170651	-4.93578	1.34863e-06	0.0194041
NNMT	-0.648949	0.131551	-4.93305	1.36617e-06	0.0196551
CALN1	0.700266	0.141959	4.93287	1.36732e-06	0.0196702
NUCB1	-0.7552	0.153109	-4.93245	1.37005e-06	0.0197082
DCDC2	0.393777	0.0798871	4.92916	1.39148e-06	0.020015
NCAM2	0.43796	0.0888569	4.92882	1.39375e-06	0.0200463
BTBD16	-0.485604	0.0986056	-4.92471	1.42103e-06	0.0204373
FAM71F1	0.636496	0.129319	4.9219	1.44001e-06	0.0207088
PI15	0.452282	0.0919293	4.91989	1.45371e-06	0.0209044
SEZ6L	0.732104	0.148828	4.91912	1.459e-06	0.0209789
MLLT4	-0.342233	0.0696734	-4.91196	1.50905e-06	0.0216971
RPS6KA2	0.618169	0.125919	4.90925	1.52839e-06	0.0219736
WDR88	0.587924	0.119831	4.90628	1.54995e-06	0.022282
EPN2	-0.753531	0.153705	-4.90245	1.57809e-06	0.022685
ZNF680	-0.531842	0.108495	-4.90198	1.58157e-06	0.0227335
DHRS4	-0.744236	0.151829	-4.90181	1.58288e-06	0.0227508
SCGB2B2	-0.376845	0.0768846	-4.90144	1.5856e-06	0.0227882
PTGER3	0.373519	0.076216	4.90079	1.59046e-06	0.0228565
CTD-3088G3.8	0.708013	0.144476	4.90055	1.59226e-06	0.0228808
KCNA2	0.474221	0.097008	4.88847	1.68515e-06	0.0242139
SULF2	-0.615416	0.125941	-4.88653	1.70056e-06	0.0244337
CMTM4	1.13255	0.23185	4.88485	1.71401e-06	0.0246251
ZNF3	-0.71662	0.146833	-4.88051	1.74925e-06	0.0251298
TNNT1	0.459268	0.0942077	4.87506	1.79446e-06	0.0257774
SERPINB12	0.571177	0.117249	4.87147	1.82487e-06	0.0262125
MYO1B	-0.423634	0.0872226	-4.85693	1.95319e-06	0.0280537
PDIA4	-0.773765	0.159338	-4.85612	1.96058e-06	0.0281578
COPA	-0.955746	0.196839	-4.85548	1.96646e-06	0.0282404
SLITRK5	0.435354	0.0897037	4.85324	1.98706e-06	0.0285342
RNF157	1.04092	0.214668	4.84899	2.02683e-06	0.0291032
GLIS1	0.605062	0.12499	4.84089	2.10477e-06	0.0302203
DHCR7	-0.78728	0.162663	-4.83995	2.11404e-06	0.0303513
RERG	0.460531	0.0951813	4.83847	2.12869e-06	0.0305595
CPEB1	0.626176	0.129416	4.83846	2.12873e-06	0.0305595
ADORA2B	0.761135	0.157358	4.83698	2.14347e-06	0.0307674
NLRP11	-0.462761	0.0958161	-4.82968	2.21746e-06	0.0318272
SCAMP5	0.74705	0.154882	4.82336	2.28347e-06	0.0327724
PRUNE2	0.557418	0.115714	4.81719	2.34982e-06	0.0337222
CNGB3	0.569856	0.1183	4.81702	2.35166e-06	0.0337463
BAIAP2L1	-0.364639	0.0757156	-4.8159	2.36396e-06	0.0339205
GRIP1	0.476008	0.0991997	4.79849	2.56244e-06	0.0367659
CHP1	-0.723302	0.150769	-4.79743	2.57503e-06	0.0369439
NLRP9	-0.575611	0.12007	-4.79397	2.61651e-06	0.0375365
WDR93	0.729878	0.152322	4.79167	2.64444e-06	0.0379346
OR5H15	-0.354559	0.074008	-4.79081	2.65491e-06	0.038082
ESYT2	0.890764	0.186142	4.7854	2.72204e-06	0.0390423
CPA4	0.434963	0.0910691	4.77619	2.84019e-06	0.040734
MLIP	-0.293924	0.0615814	-4.77293	2.88312e-06	0.0413469
VRTN	0.867169	0.181742	4.77143	2.90312e-06	0.0416307
NINL	-0.422727	0.0886125	-4.77051	2.91543e-06	0.0418044
UGDH	-0.59835	0.125515	-4.76717	2.96056e-06	0.0424485
COL14A1	0.817848	0.171755	4.76171	3.03578e-06	0.043524
LY9	0.515821	0.108358	4.76036	3.05477e-06	0.0437932
CHST10	0.669248	0.14068	4.75724	3.09882e-06	0.0444215
FAP	0.475177	0.0999312	4.75504	3.13029e-06	0.0448695
IL26	0.512089	0.107737	4.75314	3.15765e-06	0.0452586
CDH13	0.411134	0.0865427	4.75065	3.19403e-06	0.0457769
CCNYL1	-0.937579	0.197369	-4.75039	3.19787e-06	0.0458286
METAP1D	0.75227	0.158667	4.74118	3.33569e-06	0.0478005
UMODL1	0.761764	0.160871	4.73526	3.42734e-06	0.0491104
AKT3	0.600051	0.126761	4.7337	3.45188e-06	0.0494586
PPP2R1A	-0.864218	0.182607	-4.73268	3.46808e-06	0.0496872
OXR1	0.546414	0.115495	4.73106	3.49386e-06	0.0500531
SHTN1	-0.485453	0.102655	-4.72899	3.52699e-06	0.0505242
BMPR1B	0.487581	0.103153	4.72676	3.56321e-06	0.0510394
PVR	-0.678647	0.143632	-4.72488	3.59385e-06	0.0514747
SGIP1	0.515896	0.109232	4.72296	3.62557e-06	0.0519254
MSH6	1.15896	0.245536	4.7201	3.67316e-06	0.0526033
SNX6	-0.902829	0.191503	-4.71444	3.76937e-06	0.0539774
TNFRSF19	0.514521	0.10918	4.7126	3.80101e-06	0.0544267
MELK	0.787868	0.167194	4.71229	3.80642e-06	0.0545003
IMPA2	-0.894773	0.19011	-4.70659	3.9065e-06	0.0559293
PRDM5	-0.381488	0.081063	-4.70607	3.91582e-06	0.0560589
MAGI1	-0.226768	0.0482245	-4.70234	3.98295e-06	0.057016
ADAM12	0.533158	0.1134	4.70158	3.99675e-06	0.0572095
AGR2	0.56457	0.120088	4.70132	4.00139e-06	0.0572719
SRGAP1	0.724364	0.154444	4.69014	4.21e-06	0.0602535
HRASLS	0.292362	0.0623641	4.68799	4.25134e-06	0.060841
ESCO2	0.625633	0.133496	4.68653	4.27958e-06	0.0612407
CLIP4	0.591301	0.126191	4.68576	4.29465e-06	0.0614522
CCDC81	0.689808	0.147235	4.68508	4.30779e-06	0.0616359
CBX1	-0.676577	0.144446	-4.68394	4.33018e-06	0.0619518
COL24A1	0.400777	0.0856317	4.68024	4.40354e-06	0.0629971
ZNF311	0.532371	0.113888	4.67451	4.51928e-06	0.0646484
EFNA5	0.489807	0.104846	4.67167	4.57776e-06	0.0654803
POU2F3	0.898075	0.192415	4.66739	4.66741e-06	0.0667579
MYPOP	-0.685175	0.146847	-4.66591	4.69882e-06	0.0672025
METTL21C	0.579621	0.124283	4.66373	4.74539e-06	0.0678639
MAP9	0.507652	0.108936	4.6601	4.82391e-06	0.0689819
CCDC170	-0.333021	0.0715618	-4.65362	4.96702e-06	0.0710234
CACNG4	0.517716	0.111267	4.65289	4.98336e-06	0.0712521
TG	0.688146	0.147963	4.65079	5.03091e-06	0.071927
FNDC1	0.593021	0.127519	4.65044	5.03897e-06	0.0720371
SLC7A13	-0.292561	0.0629417	-4.64813	5.09173e-06	0.0727863
RSRP1	0.535792	0.115408	4.64259	5.22029e-06	0.0746188
RPH3AL	-0.74648	0.160845	-4.64099	5.25822e-06	0.0751558
FAM19A2	0.42956	0.0926841	4.63467	5.40991e-06	0.0773184
DDX4	0.649482	0.140224	4.63173	5.48183e-06	0.0783409
LRRC38	0.608026	0.131298	4.63088	5.50284e-06	0.0786356
KIAA1456	0.425582	0.0919254	4.62965	5.53354e-06	0.0790687
DDR1	-0.611941	0.132191	-4.62921	5.54452e-06	0.0792201
SBK1	0.527092	0.11389	4.62809	5.57231e-06	0.0796116
SULF1	0.402189	0.0869032	4.62801	5.5744e-06	0.0796358
ATOH8	-0.480222	0.103773	-4.6276	5.58455e-06	0.0797753
FBXO28	-0.717421	0.155068	-4.6265	5.61235e-06	0.0801668
PROX1	-0.246061	0.0531858	-4.62645	5.61358e-06	0.0801787
KIF26B	0.623574	0.134789	4.62631	5.61719e-06	0.0802247
METTL13	0.77055	0.166729	4.62157	5.73813e-06	0.0819462
PRSS3	0.837212	0.181434	4.61442	5.92513e-06	0.0846108
PMFBP1	0.86257	0.187012	4.61237	5.97966e-06	0.0853835
RNF182	0.37267	0.0808375	4.61011	6.04056e-06	0.0862471
FGF23	0.408274	0.0886471	4.60561	6.16368e-06	0.0879989
DLGAP1	0.969765	0.210607	4.60462	6.191e-06	0.0883827
NDUFAB1	-0.635221	0.137995	-4.60322	6.23e-06	0.0889333
GPN3	-0.756594	0.164386	-4.60255	6.2486e-06	0.0891926
MPND	-0.607306	0.132148	-4.59566	6.44412e-06	0.0919769
WSB2	-0.905533	0.197491	-4.58519	6.75266e-06	0.096374
DIO1	-0.754663	0.164626	-4.5841	6.78561e-06	0.0968374
CRB1	0.432378	0.0943845	4.58102	6.87929e-06	0.0981674
LGR6	0.42292	0.0923963	4.57724	6.99629e-06	0.09983
CENPJ	0.521518	0.114104	4.57055	7.20799e-06	0.102844
HBG2	0.428309	0.0938285	4.56481	7.39438e-06	0.105496
GALNTL5	0.835968	0.183152	4.56433	7.40998e-06	0.105711
ZNF804A	0.366561	0.0803983	4.55932	7.57697e-06	0.108085
CCNG2	0.686644	0.150639	4.55821	7.61437e-06	0.108611
ANKFN1	0.511088	0.112178	4.55603	7.68825e-06	0.109658
CDYL2	0.661916	0.145427	4.55153	7.84355e-06	0.111865
TC2N	0.357773	0.0787123	4.54533	8.06216e-06	0.114974
SP2	-1.00384	0.22114	-4.53939	8.27674e-06	0.118026
FBXO32	0.76447	0.16857	4.53502	8.43849e-06	0.120324
PLAGL1	0.610583	0.13464	4.53494	8.44142e-06	0.120358
VGLL4	0.945286	0.208459	4.53464	8.45282e-06	0.120512
YEATS2	1.18757	0.26207	4.5315	8.57087e-06	0.122186
KCTD21	-0.734736	0.162164	-4.53082	8.5966e-06	0.122544
CDKN3	0.773438	0.170719	4.53047	8.60997e-06	0.122727
PCYOX1L	0.624219	0.137949	4.52501	8.82008e-06	0.125713
CTD-3222D19.2	-0.72427	0.160145	-4.5226	8.9146e-06	0.127051
VPS11	-0.65219	0.144263	-4.52085	8.98374e-06	0.128027
ACSM5	-0.322539	0.071362	-4.51975	9.02727e-06	0.128639
NUP160	-0.794854	0.175886	-4.51915	9.05126e-06	0.128971
ADRM1	-0.425163	0.0941203	-4.51723	9.12825e-06	0.130059
CHODL	0.34353	0.0760916	4.51469	9.23092e-06	0.131513
CADM1	-0.227102	0.0503075	-4.51428	9.24769e-06	0.131743
NXN	-0.555048	0.122986	-4.51311	9.29561e-06	0.132416
PID1	-0.223396	0.0495181	-4.51139	9.36605e-06	0.13341
PKP2	0.401286	0.0889675	4.51048	9.40401e-06	0.133941
GALM	-1.06372	0.235936	-4.50854	9.48468e-06	0.135081
SYT13	0.581886	0.129152	4.50543	9.61507e-06	0.136928
PLA2G2C	-0.42447	0.0942281	-4.50471	9.64577e-06	0.137356
C6orf136	-0.726499	0.161421	-4.50063	9.82023e-06	0.13983
CHEK1	0.604742	0.13448	4.49689	9.98297e-06	0.142138
IP6K1	-1.16016	0.258046	-4.49594	1.00249e-05	0.142724
TTC26	0.567168	0.12617	4.49527	1.00544e-05	0.143134
BCO1	0.782193	0.174161	4.49121	1.02353e-05	0.145699
SIDT1	0.667521	0.148646	4.49067	1.02594e-05	0.146033
TAF4B	0.560503	0.125026	4.48311	1.06054e-05	0.150947
KRT79	0.584189	0.130409	4.47967	1.07667e-05	0.153232
SEMA4F	0.559145	0.124973	4.47414	1.10305e-05	0.156975
PROM1	0.702777	0.157157	4.4718	1.11439e-05	0.158577
B4GALT6	0.656769	0.146881	4.47145	1.11612e-05	0.158812
MRGPRX4	0.642181	0.143858	4.46398	1.15315e-05	0.16407
IL20RA	0.388667	0.0871027	4.46216	1.16234e-05	0.165367
CDH10	-0.319263	0.0715807	-4.46018	1.17247e-05	0.166796
PIGR	0.636248	0.142756	4.4569	1.18937e-05	0.169187
FRMD5	0.622284	0.139716	4.45391	1.20494e-05	0.171391
TMEM178A	0.673094	0.151154	4.45302	1.20964e-05	0.172047
RNF41	-0.832582	0.187006	-4.45218	1.21408e-05	0.172666
WDR63	0.744269	0.167334	4.44781	1.2374e-05	0.175971
BTF3L4	-0.811879	0.182583	-4.44664	1.24376e-05	0.176863
CECR1	-0.716341	0.161188	-4.44414	1.25736e-05	0.178784
SLC19A3	-0.282746	0.0636226	-4.44411	1.25753e-05	0.178796
C20orf96	-0.624665	0.140725	-4.4389	1.28636e-05	0.182881
FUT8	0.326653	0.0736455	4.43548	1.30562e-05	0.185607
ISM1	-0.271342	0.0611813	-4.43504	1.30814e-05	0.185952
TANGO6	-0.725274	0.163597	-4.4333	1.31804e-05	0.187346
RNF6	0.931295	0.210129	4.43202	1.32541e-05	0.18838
POM121L2	0.502102	0.113301	4.43157	1.328e-05	0.188735
MCEE	-0.679594	0.153378	-4.43083	1.33225e-05	0.189326
TNFRSF10B	-0.496037	0.111953	-4.43077	1.33263e-05	0.189367
WDR89	-0.979025	0.221024	-4.4295	1.33999e-05	0.190399
SORBS3	-0.580022	0.131158	-4.42232	1.38237e-05	0.196408
ARNTL2	0.642637	0.145329	4.42194	1.3847e-05	0.196724
PEX7	0.684795	0.15487	4.42174	1.38589e-05	0.196879
WDR66	1.01123	0.228701	4.42161	1.38663e-05	0.196971
ARPC1A	-1.07548	0.243372	-4.4191	1.40182e-05	0.199114
SCN10A	0.627049	0.141897	4.41903	1.40222e-05	0.199157
EPAS1	-0.651566	0.147453	-4.41881	1.40356e-05	0.199334
KIAA0895	0.852143	0.19287	4.41822	1.4072e-05	0.199837
ADGRD1	-0.595732	0.134875	-4.41693	1.41509e-05	0.200943
TEX15	0.510154	0.115511	4.41651	1.41761e-05	0.201286
GMDS	0.93581	0.212079	4.41256	1.44211e-05	0.204751
RP11-219A15.1	-0.297173	0.0674245	-4.4075	1.47404e-05	0.209269
CHRNA7	0.467807	0.106175	4.40598	1.48374e-05	0.210632
EIF4E3	0.455067	0.103364	4.40256	1.50586e-05	0.213757
ZNF704	0.542245	0.123231	4.40025	1.52095e-05	0.215884
CCDC83	0.658395	0.149631	4.40013	1.52175e-05	0.215982
PPP2R5D	-0.895557	0.203542	-4.39987	1.52346e-05	0.216209
METTL8	0.75505	0.17165	4.39876	1.53073e-05	0.217226
C19orf54	-0.665608	0.151419	-4.39581	1.55039e-05	0.22
WFDC1	0.448371	0.102031	4.39445	1.55952e-05	0.22128
TOX	0.496447	0.11299	4.39372	1.56444e-05	0.221962
RANBP10	-0.695987	0.158414	-4.39346	1.56616e-05	0.222192
TNRC6C	1.39651	0.317957	4.39213	1.57519e-05	0.223456
NHSL1	-0.576629	0.131337	-4.39045	1.58663e-05	0.225064
C3orf70	0.568206	0.129441	4.38971	1.59172e-05	0.225769
SLC39A14	-0.726689	0.16561	-4.38795	1.60379e-05	0.227466
GLRB	0.431042	0.0982388	4.3877	1.60553e-05	0.227697
CLPTM1	-0.667858	0.1523	-4.38516	1.62321e-05	0.230187
ST6GALNAC3	0.43064	0.0982051	4.38511	1.62358e-05	0.230223
STYK1	0.520981	0.118868	4.38285	1.63942e-05	0.232454
WIF1	0.479585	0.109433	4.38246	1.64217e-05	0.232827
DTX4	-0.573131	0.130814	-4.38126	1.65068e-05	0.234017
FARS2	0.780812	0.178486	4.37465	1.69834e-05	0.240757
NUTF2	-0.808265	0.184805	-4.37362	1.70588e-05	0.241809
SMUG1	-0.636529	0.145596	-4.37187	1.71871e-05	0.243609
AOC1	-0.601591	0.137713	-4.36845	1.74419e-05	0.247204
GALNT9	0.463021	0.106004	4.36794	1.748e-05	0.247726
FRMPD2	0.534472	0.122468	4.36418	1.77645e-05	0.25174
GEMIN2	-0.621012	0.142318	-4.36354	1.78129e-05	0.252409
C3orf52	0.475882	0.109073	4.36298	1.78557e-05	0.252997
MROH8	0.809322	0.185667	4.35899	1.81644e-05	0.257353
CPA2	0.528806	0.121319	4.35882	1.81777e-05	0.257523
EZH1	-0.759447	0.174329	-4.35641	1.83661e-05	0.260173
RP11-231C18.3	0.882065	0.20249	4.3561	1.83904e-05	0.2605
KCNMB2	0.488872	0.112296	4.35343	1.86021e-05	0.26348
SNX31	0.835943	0.192088	4.35188	1.8726e-05	0.265217
DACT1	0.458197	0.105606	4.33873	1.98094e-05	0.28054
PLG	-0.200831	0.0462984	-4.33777	1.98908e-05	0.281674
ZNF488	0.592324	0.136574	4.33704	1.99529e-05	0.282533
SUMO1	-0.818646	0.188768	-4.33679	1.99739e-05	0.28281
AMPD1	0.575696	0.132765	4.33622	2.00227e-05	0.283481
PLCL1	0.471402	0.108726	4.33569	2.00676e-05	0.284098
THSD4	-0.294388	0.0680187	-4.32805	2.07323e-05	0.293486
CACNB4	0.527898	0.122056	4.32506	2.09984e-05	0.297233
CATSPERB	0.35696	0.0825513	4.3241	2.10843e-05	0.298427
SERPINE2	0.419359	0.097068	4.32026	2.14318e-05	0.303324
SOSTDC1	0.514159	0.119126	4.3161	2.18148e-05	0.308723
CRACR2A	0.788336	0.182678	4.31544	2.18763e-05	0.309571
LIG3	-0.560522	0.129943	-4.31361	2.20474e-05	0.31197
PIP5K1B	0.437982	0.101548	4.31304	2.21009e-05	0.312706
OCSTAMP	0.425834	0.0987524	4.31214	2.21857e-05	0.313883
NAGLU	-0.578352	0.134139	-4.31158	2.22386e-05	0.314609
C11orf49	0.606485	0.140718	4.30992	2.23958e-05	0.316811
SAMD3	0.457289	0.106112	4.30947	2.24382e-05	0.317388
INSR	-1.05876	0.245787	-4.30762	2.26156e-05	0.319875
CD1D	-0.452185	0.104977	-4.30746	2.2631e-05	0.320071
CYP2C9	-0.251701	0.0584705	-4.30475	2.28927e-05	0.323749
NRBP2	-0.402622	0.0935455	-4.30403	2.29629e-05	0.324718
ESM1	0.465825	0.108452	4.29521	2.38375e-05	0.337062
IGFBP2	-0.369142	0.0859665	-4.29402	2.39585e-05	0.33875
CPA5	0.397104	0.0924877	4.29358	2.40026e-05	0.339348
GALK2	0.769309	0.17933	4.2899	2.43795e-05	0.344653
FAM131B	0.454384	0.106035	4.28521	2.48688e-05	0.351545
PPFIBP2	-0.456974	0.10668	-4.28358	2.50405e-05	0.353947
ZNF518A	0.730952	0.17078	4.28009	2.54125e-05	0.35918
BEND4	0.507063	0.118543	4.27744	2.56984e-05	0.363196
RHCE	0.562833	0.131584	4.27736	2.57071e-05	0.363293
STAP1	0.512013	0.119706	4.27726	2.57182e-05	0.363424
LAMC3	0.522722	0.122244	4.27606	2.58487e-05	0.365242
TBC1D5	0.625618	0.146311	4.27595	2.58614e-05	0.365395
FHL2	0.392749	0.0918822	4.27449	2.6021e-05	0.367625
TAF1B	0.749946	0.1757	4.26833	2.67063e-05	0.377279
DRG1	-1.0258	0.240494	-4.26537	2.70412e-05	0.381984
CEP128	0.50026	0.117298	4.26485	2.71006e-05	0.382795
SCOC	0.622681	0.146169	4.26002	2.76573e-05	0.390631
EIF4EBP1	-0.850223	0.19975	-4.25643	2.8078e-05	0.396545
LIPI	0.400241	0.0940352	4.25629	2.80953e-05	0.396762
VPS16	0.839329	0.197328	4.25348	2.84284e-05	0.401437
TOR3A	-0.572968	0.134928	-4.24648	2.92774e-05	0.413397
ADCK3	-1.08072	0.25456	-4.24545	2.94041e-05	0.415156
RUNX1	0.568403	0.133916	4.24447	2.95256e-05	0.416842
KIF27	0.750679	0.176881	4.24398	2.95859e-05	0.417664
TSFM	-0.569135	0.134109	-4.24383	2.96046e-05	0.417898
TTLL9	0.950871	0.224085	4.24336	2.96635e-05	0.418701
BCAS1	0.725581	0.171005	4.24303	2.97047e-05	0.419252
COX5A	-0.839487	0.197992	-4.24	3.00845e-05	0.424583
GUSB	-0.632758	0.149253	-4.23949	3.01491e-05	0.425464
ATP8A1	0.437035	0.10312	4.2381	3.03255e-05	0.427923
HS3ST3A1	0.431857	0.102078	4.23066	3.12853e-05	0.441435
CEACAM19	-0.562334	0.132948	-4.22974	3.14052e-05	0.443095
NUDT2	-0.586506	0.13868	-4.2292	3.14772e-05	0.444081
NXNL2	0.721033	0.170493	4.2291	3.149e-05	0.444229
SUN3	0.622716	0.147261	4.22866	3.15482e-05	0.445019
TRAPPC2L	-0.463334	0.109605	-4.22729	3.17294e-05	0.447544
CENPF	0.639793	0.151351	4.2272	3.17416e-05	0.447683
GYPE	0.389113	0.0920591	4.22677	3.17984e-05	0.448454
IL1A	0.483807	0.114517	4.22477	3.20654e-05	0.452187
FAM13C	-0.265112	0.0627547	-4.22458	3.20916e-05	0.452524
PPARGC1A	-0.226713	0.0536774	-4.22362	3.22206e-05	0.454311
DEPDC1	0.426824	0.101086	4.22239	3.23867e-05	0.45662
EZH2	0.590362	0.139845	4.22155	3.25009e-05	0.458197
PRPF3	-0.565368	0.133939	-4.22109	3.25633e-05	0.459045
LACTBL1	0.532622	0.126198	4.22054	3.26376e-05	0.46006
DNAJB13	0.736989	0.174705	4.21848	3.29196e-05	0.464001
DIO2	0.388397	0.0920723	4.2184	3.29311e-05	0.464131
KRT2	0.488455	0.115812	4.21764	3.30355e-05	0.465569
EFTUD1	0.683436	0.162077	4.21673	3.31609e-05	0.467304
DTNA	0.590661	0.140151	4.21446	3.34776e-05	0.471733
ABLIM1	-0.604728	0.143574	-4.21197	3.38272e-05	0.476625
SHC4	0.491378	0.116666	4.21182	3.38478e-05	0.476882
COQ5	-0.849322	0.201811	-4.2085	3.43191e-05	0.483487
GFPT2	0.655237	0.155709	4.20808	3.43797e-05	0.484306
SLC27A5	-0.481995	0.114562	-4.2073	3.4492e-05	0.485854

## Sheet: Table S5
Table S5. Enriched KEGG pathways among differentially modified genes between EAs and AAs with MM.
KEGG ID	Description	Count	p-value	Adjusted p-value	Symbol
hsa01250	Biosynthesis of nucleotide sugars	5	0.00145918	0.0233469	HKDC1/UGDH/GMDS/GALK2/GFPT2
hsa00604	Glycosphingolipid biosynthesis - ganglio series	3	0.00443563	0.0665345	ST8SIA1/ST8SIA5/ST6GALNAC3
hsa00520	Amino sugar and nucleotide sugar metabolism	5	0.00511333	0.0715866	HKDC1/UGDH/GMDS/GALK2/GFPT2
hsa05412	Arrhythmogenic right ventricular cardiomyopathy	6	0.00836343	0.108725	DSC2/SGCG/LEF1/CACNG4/PKP2/CACNB4
hsa00531	Glycosaminoglycan degradation	3	0.00883027	0.108725	HPSE2/NAGLU/GUSB
hsa04360	Axon guidance	10	0.0091278	0.108725	SLIT3/FZD3/SEMA5B/SLIT1/PTCH1/BMPR1B/SRGAP1/EFNA5/SEMA4F/ABLIM1
hsa04931	Insulin resistance	7	0.0120224	0.120224	ACACB/RPS6KA2/AKT3/AKT3/INSR/PPARGC1A/GFPT2/SLC27A5
hsa04152	AMPK signaling pathway	7	0.0204248	0.183823	ACACB/AKT3/AKT3/PPP2R1A/PPP2R5D/INSR/EIF4EBP1/PPARGC1A
hsa04666	Fc gamma R-mediated phagocytosis	6	0.0239873	0.191898	PLA2G4C/SCIN/AMPH/AKT3/AKT3/ARPC1A/PIP5K1B
hsa01524	Platinum drug resistance	5	0.0259629	0.191898	GSTM2/GSTM5/FASLG/AKT3/AKT3/MSH6
hsa04932	Non-alcoholic fatty liver disease	8	0.0263203	0.191898	SDHA/XBP1/FASLG/AKT3/AKT3/NDUFAB1/INSR/COX5A/IL1A
hsa00591	Linoleic acid metabolism	3	0.0281696	0.191898	PLA2G4C/PLA2G2C/CYP2C9
hsa00983	Drug metabolism - other enzymes	5	0.0366032	0.191898	GSTM2/CES1/CES1/GSTM5/UPP2/GUSB
hsa04910	Insulin signaling pathway	7	0.0383143	0.191898	HKDC1/ACACB/AKT3/AKT3/INSR/EIF4EBP1/PPARGC1A/SHC4
hsa04014	Ras signaling pathway	10	0.0412085	0.191898	RASA4B/EXOC2/PLA2G4C/FASLG/AKT3/AKT3/EFNA5/FGF23/PLA2G2C/INSR/SHC4
hsa00512	Mucin type O-glycan biosynthesis	3	0.0490214	0.191898	GALNTL5/ST6GALNAC3/GALNT9/GALNT9

## Sheet: Table S6
Table S6. Top 500 differentially modified gene bodies between MM and its precursors in EA patients.
Symbol	Coefficient	Standard Error	t-value	p-value	FDR
FAM19A2	-0.399624	0.0629778	-6.34547	1.22206e-09	1.78238e-05
ATXN7L2	0.554332	0.087418	6.34116	1.25134e-09	1.82495e-05
CDK14	-0.499525	0.0823573	-6.06533	5.58037e-09	8.13786e-05
PTH2R	-0.529433	0.0886624	-5.97134	9.19426e-09	0.000134071
STARD13	0.401005	0.0676103	5.93113	1.13654e-08	0.000165719
ZBTB7C	0.783642	0.135813	5.77001	2.63179e-08	0.000383715
SYCP2	-0.423483	0.0742569	-5.70294	3.71535e-08	0.000541661
HERPUD2	-0.568994	0.106065	-5.3646	2.02654e-07	0.00295429
DCT	-0.463945	0.0878114	-5.28343	3.01124e-07	0.00438949
DDB2	0.76552	0.145341	5.26706	3.2599e-07	0.00475163
SRPK2	-0.922396	0.17587	-5.24476	3.63085e-07	0.00529197
SEMA3C	-0.32965	0.062948	-5.23687	3.77182e-07	0.00549705
TPST1	-0.714717	0.141765	-5.04156	9.54961e-07	0.0139167
ZNF346	0.729923	0.145029	5.03293	9.94386e-07	0.0144902
ZHX2	-0.751156	0.14936	-5.02917	1.01206e-06	0.0147468
ZNF385D	-0.205228	0.040912	-5.01633	1.07474e-06	0.0156589
LCOR	-0.747346	0.151131	-4.94501	1.49727e-06	0.0218138
ZNF804A	-0.281612	0.0569726	-4.94293	1.51172e-06	0.0220228
NF2	-0.67903	0.137979	-4.92125	1.67084e-06	0.0243391
FOLR1	0.483367	0.0982368	4.92042	1.67722e-06	0.0244304
GPR176	-0.56106	0.114263	-4.91024	1.75773e-06	0.0256014
PTPN14	0.273832	0.0560309	4.88715	1.95439e-06	0.0284637
HECW1	-0.550584	0.1127	-4.8854	1.97009e-06	0.0286904
OLFM3	-0.202592	0.0416128	-4.8685	2.12861e-06	0.0309968
NOL3	0.442583	0.0910097	4.86303	2.1825e-06	0.0317793
PLCL2	-0.509585	0.105094	-4.84885	2.3284e-06	0.0339016
NLGN1	-0.295752	0.06102	-4.8468	2.35019e-06	0.0342165
CCDC17	0.397934	0.0823039	4.83493	2.48072e-06	0.0361143
C19orf54	0.506483	0.105531	4.79938	2.9149e-06	0.0424322
MARCH8	-0.786524	0.164023	-4.79519	2.9706e-06	0.0432401
SOS2	-0.63516	0.132683	-4.78704	3.082e-06	0.0448586
CCDC62	-0.550981	0.11532	-4.77786	3.21236e-06	0.0467527
IPPK	0.61399	0.128616	4.77383	3.27132e-06	0.0476075
TGFBRAP1	-0.890842	0.186883	-4.76683	3.37604e-06	0.0491281
CNTNAP2	-0.35466	0.0744103	-4.76627	3.38456e-06	0.0492487
RANBP3	0.715278	0.150112	4.76498	3.40429e-06	0.0495324
TTC8	-0.400132	0.0840194	-4.76238	3.44437e-06	0.0501122
VAMP3	-0.459949	0.0968628	-4.74846	3.6667e-06	0.0533431
CAPN2	0.682168	0.144016	4.73674	3.86446e-06	0.0562162
TMEM37	0.390115	0.0827194	4.71613	4.23773e-06	0.061642
ANKMY2	-0.442331	0.094191	-4.69611	4.63326e-06	0.0673908
GTF2B	-0.6263	0.13364	-4.68648	4.83612e-06	0.0703366
SLC44A4	0.473723	0.102035	4.64274	5.86988e-06	0.0853656
ARMC8	-0.491964	0.106064	-4.63837	5.98415e-06	0.0870215
RP11-96L14.8	0.386363	0.0833639	4.63465	6.08313e-06	0.0884549
ZNFX1	0.680901	0.146918	4.63457	6.0852e-06	0.0884788
PCNXL4	-0.501993	0.108333	-4.6338	6.10599e-06	0.088775
TFF3	-0.317366	0.0685858	-4.62729	6.28359e-06	0.0913509
SLC25A12	-0.757542	0.163842	-4.62361	6.38611e-06	0.0928348
TMPRSS15	-0.352032	0.0766286	-4.594	7.27243e-06	0.105712
TKFC	0.437422	0.095315	4.58923	7.42604e-06	0.107938
FCHSD2	-0.548085	0.119515	-4.58591	7.53463e-06	0.109508
HSPB8	0.266982	0.0582463	4.58367	7.60889e-06	0.11058
MKX	-0.298434	0.0651773	-4.57879	7.77258e-06	0.112951
BAG3	0.413471	0.0905422	4.56661	8.19688e-06	0.119109
ARFGEF1	-0.575285	0.126306	-4.5547	8.63341e-06	0.125444
PCOLCE2	-0.326729	0.0719758	-4.53942	9.22609e-06	0.134046
PBX3	-0.509292	0.112447	-4.52918	9.64512e-06	0.140124
CDAN1	0.397855	0.0878518	4.52871	9.66468e-06	0.140399
FBXL20	-0.84291	0.18613	-4.52862	9.66841e-06	0.140443
PSMC3	0.433624	0.0959257	4.52041	1.0018e-05	0.145511
UHRF2	-0.595838	0.131873	-4.51828	1.01109e-05	0.14685
INSIG2	-0.310595	0.0687581	-4.51721	1.01577e-05	0.14752
BIRC6	-0.640495	0.142553	-4.49303	1.12751e-05	0.163736
SULT1A2	0.404977	0.0903231	4.48365	1.17392e-05	0.170465
SDHAF4	-0.355911	0.0794113	-4.48187	1.18294e-05	0.171763
FAM110B	-0.314348	0.0701739	-4.47956	1.19473e-05	0.173463
SPPL3	-0.746688	0.167051	-4.46982	1.24576e-05	0.180859
MYO1E	0.52479	0.117447	4.46831	1.25387e-05	0.182025
SEC63	-0.495704	0.111408	-4.44944	1.35936e-05	0.197325
APOBEC1	-0.456591	0.102627	-4.44902	1.36181e-05	0.197666
RPS6KA2	-0.393714	0.0888846	-4.42949	1.48014e-05	0.214827
SLAIN1	-0.290841	0.0657195	-4.42548	1.50565e-05	0.218515
CTC-432M15.3	-0.259788	0.0587655	-4.42076	1.53618e-05	0.222931
FAS	-0.479534	0.10865	-4.41355	1.584e-05	0.229855
UBE2Q1	0.477827	0.108288	4.41255	1.5908e-05	0.230824
STIM1	-0.581445	0.13179	-4.41189	1.59523e-05	0.231453
CERS6	-0.447519	0.10157	-4.40602	1.63547e-05	0.237275
LGALS3BP	0.377071	0.0856079	4.40463	1.64515e-05	0.238662
FDPS	0.553485	0.12583	4.39867	1.68729e-05	0.244759
UBR2	-0.525154	0.119398	-4.39836	1.68949e-05	0.245061
SLMAP	-0.774669	0.176376	-4.39214	1.73454e-05	0.251578
KIF5C	-0.372225	0.0848548	-4.38661	1.77565e-05	0.257523
IGFBP2	0.272894	0.0622604	4.38311	1.80211e-05	0.261342
CCNG2	-0.476923	0.108812	-4.383	1.80298e-05	0.261451
SESN3	-0.344009	0.0785013	-4.38221	1.80896e-05	0.2623
AVIL	0.484664	0.110656	4.3799	1.8267e-05	0.264854
KPNA1	-0.672515	0.153754	-4.37396	1.87313e-05	0.271567
HTATIP2	0.527062	0.120513	4.37348	1.8769e-05	0.272095
GPC5	-0.24783	0.0566858	-4.372	1.88866e-05	0.27378
IGFBP4	0.381073	0.0872175	4.36923	1.91089e-05	0.276983
ZBED5	-0.488664	0.112097	-4.35931	1.99236e-05	0.288773
EML5	-0.380163	0.0873316	-4.3531	2.04516e-05	0.296405
PLCL1	-0.353158	0.0816538	-4.32507	2.30027e-05	0.333355
PROM1	-0.495012	0.114619	-4.31878	2.3616e-05	0.342219
CLINT1	-0.472869	0.109588	-4.31495	2.39963e-05	0.347706
C4orf22	-0.260367	0.060383	-4.31193	2.43012e-05	0.3521
STXBP5	-0.315099	0.0730904	-4.31108	2.43871e-05	0.353321
RBM4	0.655946	0.152261	4.30804	2.46991e-05	0.357816
GLCCI1	-0.277185	0.0643613	-4.3067	2.48372e-05	0.359791
GCN1	0.53216	0.123922	4.2943	2.61537e-05	0.378837
KAT6B	-0.69363	0.161816	-4.28654	2.70122e-05	0.391245
PPM1B	-0.460739	0.107501	-4.28591	2.70827e-05	0.392238
SBSPON	-0.537982	0.125855	-4.27462	2.83818e-05	0.411025
PPM1G	0.735323	0.172223	4.2696	2.89789e-05	0.419644
SCAF8	-0.530549	0.12449	-4.26179	2.99313e-05	0.433405
RSBN1	-0.434116	0.101956	-4.25787	3.04196e-05	0.440445
CETN3	-0.330566	0.0776555	-4.25683	3.05509e-05	0.442316
SMARCD2	0.427602	0.100462	4.25636	3.06111e-05	0.443157
PCSK7	0.542609	0.127512	4.25534	3.07397e-05	0.444988
CYB561	0.357103	0.0839774	4.25237	3.11197e-05	0.450457
SYNM	0.352057	0.0828555	4.24904	3.15497e-05	0.45665
VNN3	-0.258132	0.0608268	-4.24372	3.22507e-05	0.466764
LEMD3	-0.357199	0.0843033	-4.23707	3.31464e-05	0.479694
NDUFB6	-0.476977	0.112603	-4.23591	3.33055e-05	0.481964
PKP2	-0.281908	0.0665681	-4.23488	3.34468e-05	0.483975
PPP1R12A	-0.35291	0.0835261	-4.22514	3.48138e-05	0.503721
FBXL17	-0.364135	0.0861887	-4.22486	3.48549e-05	0.504281
CNTN1	-0.296783	0.070258	-4.22419	3.49501e-05	0.505623
RECQL4	0.267668	0.0634499	4.21857	3.57661e-05	0.517392
HS3ST5	-0.238253	0.0565102	-4.21611	3.61295e-05	0.522613
TMEM86A	0.433897	0.103043	4.21084	3.69183e-05	0.533986
WDR92	-0.533716	0.126803	-4.20902	3.71961e-05	0.537967
IL18BP	0.475401	0.112954	4.20881	3.72272e-05	0.53838
TNRC6B	-0.782467	0.185947	-4.20801	3.73502e-05	0.540122
CDK19	-0.678693	0.161454	-4.20363	3.8025e-05	0.549841
ASGR1	0.334439	0.0796811	4.19722	3.90361e-05	0.564423
TXN2	0.524616	0.125084	4.19412	3.9534e-05	0.571583
PCGF2	0.328195	0.0783592	4.18834	4.04789e-05	0.585203
MGA	-0.798214	0.190732	-4.18501	4.10328e-05	0.593171
RSPO2	-0.324068	0.0774805	-4.18257	4.14432e-05	0.599062
NECAB1	-0.385679	0.0922326	-4.18159	4.16097e-05	0.601427
NAALADL2	-0.255362	0.0611155	-4.17835	4.21627e-05	0.609377
MCRS1	0.443457	0.106172	4.17679	4.24313e-05	0.613218
HELLS	-0.530715	0.127099	-4.17561	4.26359e-05	0.616132
COL4A3BP	-0.425783	0.10199	-4.17475	4.27849e-05	0.618241
TERF1	-0.327693	0.0785024	-4.17431	4.28624e-05	0.619318
KRTAP9-9	-0.327832	0.0785492	-4.17359	4.29883e-05	0.621095
SUMF1	-0.435245	0.104326	-4.17196	4.32743e-05	0.625184
EIF4G3	-0.450235	0.107984	-4.16947	4.37138e-05	0.631489
INCENP	0.498554	0.119593	4.16877	4.384e-05	0.633269
SESN1	-0.527384	0.126563	-4.16696	4.41625e-05	0.637883
SLK	-0.34408	0.0825936	-4.16594	4.43463e-05	0.640494
PDZD8	-0.308455	0.0740768	-4.16399	4.46993e-05	0.645548
AP2S1	0.431875	0.103733	4.16333	4.482e-05	0.647245
ANKRD12	-0.41215	0.0990311	-4.16183	4.50945e-05	0.651165
PGM1	-0.384899	0.0925126	-4.1605	4.53378e-05	0.654633
LMNA	0.364428	0.0876112	4.1596	4.55037e-05	0.656982
KLHL8	-0.576317	0.138572	-4.15896	4.56218e-05	0.658641
NEIL3	-0.344499	0.0828711	-4.15704	4.59795e-05	0.663761
STRN	-0.614019	0.147763	-4.15542	4.62836e-05	0.668103
TEX15	-0.349858	0.0842331	-4.15345	4.66548e-05	0.673416
MED15	0.725652	0.175146	4.14314	4.8646e-05	0.702107
KLK10	0.383979	0.0927068	4.14186	4.88975e-05	0.705689
RAB21	-0.396382	0.0957546	-4.13956	4.93552e-05	0.712245
CNOT6	-0.474138	0.114568	-4.13847	4.95727e-05	0.715334
RBM46	-0.362203	0.0875509	-4.13706	4.98569e-05	0.719385
CYB5R4	-0.401645	0.0971205	-4.13553	5.01654e-05	0.723787
NCOR1	-0.857893	0.207481	-4.1348	5.03155e-05	0.725901
FAM102B	-0.312705	0.075757	-4.12775	5.17692e-05	0.746822
TM9SF2	-0.394477	0.0955895	-4.12678	5.1972e-05	0.749695
SMC3	-0.357769	0.0867989	-4.12181	5.30234e-05	0.76481
FAM134B	-0.275449	0.0669065	-4.11693	5.4078e-05	0.779967
PREPL	-0.37202	0.0904107	-4.11478	5.4548e-05	0.786692
ARHGAP15	-0.225606	0.0548587	-4.1125	5.50508e-05	0.793887
TRPC1	-0.390375	0.0949378	-4.1119	5.51842e-05	0.795757
GPD2	-0.380154	0.0924749	-4.11089	5.54087e-05	0.798938
MTMR3	-0.353526	0.0860354	-4.10908	5.58152e-05	0.804743
ASXL2	-0.612046	0.148962	-4.10874	5.58907e-05	0.805777
PCNX	-0.35819	0.087316	-4.10222	5.7374e-05	0.827103
RANBP17	-0.398143	0.0970598	-4.10204	5.7416e-05	0.827651
TTC9	-0.402024	0.0980305	-4.10101	5.76549e-05	0.831038
TPRN	0.30143	0.0735504	4.09827	5.82918e-05	0.840159
CD276	0.494039	0.120693	4.09336	5.94519e-05	0.856821
CNTRL	-0.469517	0.114807	-4.08961	6.03537e-05	0.869757
PAXBP1	-0.296638	0.0725447	-4.08904	6.0491e-05	0.871675
TNKS2	-0.459037	0.11248	-4.08106	6.24575e-05	0.89995
AMD1	-0.481871	0.118105	-4.08002	6.2717e-05	0.903626
HOMEZ	-0.56174	0.137702	-4.07938	6.28783e-05	0.905887
RPUSD1	0.301268	0.0739513	4.07387	6.42795e-05	0.926011
STK4	-0.385542	0.0946534	-4.0732	6.44517e-05	0.928427
ATF1	-0.818041	0.200844	-4.07302	6.44975e-05	0.929023
PKN2	-0.418739	0.103067	-4.0628	6.71827e-05	0.967632
CACUL1	-0.447536	0.110339	-4.05599	6.90318e-05	0.994196
SYNPO	0.379374	0.0936314	4.05179	7.01975e-05	1
TBC1D15	-0.449512	0.110959	-4.05117	7.03703e-05	1
EDC4	0.352134	0.0869443	4.05011	7.06683e-05	1
HNRNPLL	-0.320674	0.0791891	-4.04947	7.08482e-05	1
ZNF79	0.570448	0.140884	4.04906	7.09624e-05	1
C8orf88	-0.305662	0.0754901	-4.04903	7.09711e-05	1
RNLS	-0.37704	0.0931449	-4.04789	7.12936e-05	1
RBM11	-0.223314	0.0551851	-4.04663	7.16511e-05	1
TNS4	0.402695	0.0996683	4.04035	7.34631e-05	1
GRIN2C	0.317383	0.0785545	4.04029	7.34798e-05	1
PDCD4	-0.284493	0.0704173	-4.0401	7.35353e-05	1
UBQLN4	0.469117	0.116142	4.03917	7.38093e-05	1
BPTF	-0.948028	0.234875	-4.0363	7.46525e-05	1
TMEM150A	0.351044	0.0870677	4.03185	7.59839e-05	1
NT5DC2	0.348796	0.0865817	4.02851	7.69949e-05	1
TMEM260	-0.513209	0.127417	-4.02778	7.72207e-05	1
PLA2G16	0.526882	0.130831	4.02718	7.74033e-05	1
ANKFN1	-0.322285	0.0800754	-4.02477	7.8145e-05	1
RGS21	-0.263919	0.0656764	-4.01848	8.01143e-05	1
KIAA1033	-0.409516	0.101923	-4.01791	8.02959e-05	1
DNAJC1	-0.595887	0.14854	-4.01162	8.23184e-05	1
COL28A1	-0.378844	0.0944455	-4.01125	8.24379e-05	1
NR1H3	0.434743	0.108428	4.00951	8.3007e-05	1
STMND1	-0.411892	0.10274	-4.00906	8.31539e-05	1
SH2D2A	0.41111	0.10257	4.0081	8.34686e-05	1
MADD	0.667018	0.166457	4.00714	8.37876e-05	1
BRAF	-0.44325	0.1107	-4.00406	8.48098e-05	1
FHOD1	0.303416	0.0758622	3.99957	8.63259e-05	1
COL14A1	-0.49473	0.123768	-3.99723	8.71242e-05	1
EML4	-0.335231	0.0838741	-3.99684	8.72603e-05	1
PPM1A	-0.380208	0.0951637	-3.9953	8.77891e-05	1
CNNM2	-0.595936	0.149199	-3.99424	8.81582e-05	1
ITGB3BP	-0.427625	0.107184	-3.98964	8.97653e-05	1
DARS	-0.343344	0.0860604	-3.98957	8.97909e-05	1
AMPD1	-0.41506	0.104125	-3.98618	9.09982e-05	1
HIRIP3	0.358984	0.0900617	3.98598	9.10697e-05	1
RPS5	0.379534	0.0952276	3.98555	9.12226e-05	1
IPO8	-0.323044	0.0813342	-3.97182	9.6274e-05	1
MMP15	0.26576	0.0669611	3.96887	9.73918e-05	1
HMGA2	-0.316863	0.0799189	-3.9648	9.89576e-05	1
TMED3	-0.315963	0.0797163	-3.96359	9.94272e-05	1
DACH1	-0.233051	0.0588165	-3.96234	9.99143e-05	1
STAB1	0.314205	0.0793049	3.96198	0.000100055	1
RNF130	-0.652632	0.164828	-3.95947	0.000101041	1
UBL3	-0.309282	0.0782283	-3.95358	0.000103394	1
IQUB	-0.35979	0.0910226	-3.95276	0.000103728	1
MPI	0.468851	0.118768	3.94761	0.000105834	1
TM7SF3	-0.494822	0.12542	-3.94533	0.000106777	1
ENPP6	-0.423671	0.107437	-3.94343	0.000107574	1
TSPYL5	0.309275	0.0784389	3.94287	0.000107807	1
ADK	-0.541469	0.13748	-3.93853	0.000109647	1
COX5A	0.535994	0.136121	3.93762	0.000110036	1
RRNAD1	0.381992	0.0970147	3.93747	0.000110101	1
ZDHHC2	-0.408485	0.103836	-3.93393	0.00011163	1
CCDC84	0.549235	0.139627	3.93358	0.000111779	1
AHI1	-0.355797	0.0904602	-3.93318	0.000111953	1
RFX3	-0.314126	0.0798748	-3.93274	0.000112147	1
PPP3CA	-0.314102	0.079895	-3.93144	0.000112716	1
GAS2L1	0.258698	0.0658131	3.9308	0.000112996	1
MCU	-0.310962	0.0791505	-3.92874	0.000113904	1
IVNS1ABP	-0.230505	0.0586959	-3.92711	0.000114629	1
CFAP58	-0.297401	0.0757793	-3.92457	0.000115765	1
OSBPL8	-0.39064	0.0996088	-3.92175	0.000117041	1
AKR1A1	0.518285	0.132184	3.92094	0.000117409	1
GALNTL6	-0.330866	0.0844018	-3.92013	0.000117779	1
DTNA	-0.415906	0.106112	-3.91948	0.000118073	1
RYBP	-0.384819	0.0982316	-3.91747	0.000119001	1
MMRN2	0.320394	0.0818067	3.91647	0.000119459	1
TCOF1	0.509516	0.1301	3.91634	0.00011952	1
TRIM66	0.536897	0.137212	3.91291	0.00012112	1
CLCN6	0.680969	0.174253	3.90792	0.000123483	1
EFNA1	0.358925	0.0918489	3.90777	0.000123555	1
TMEM196	-0.305371	0.0782249	-3.90375	0.000125491	1
NCOA1	-0.526213	0.134863	-3.90183	0.000126427	1
ARHGAP24	-0.28028	0.0718565	-3.90055	0.000127055	1
IRS2	-0.353684	0.090711	-3.89902	0.000127808	1
ERG	-0.282738	0.0725401	-3.89767	0.000128476	1
CRISP3	-0.167595	0.0430031	-3.89728	0.000128672	1
FAM159B	-0.39365	0.101023	-3.89664	0.000128991	1
CHEK1	-0.381576	0.0979752	-3.89462	0.00013	1
KLF15	0.356399	0.0915212	3.89417	0.000130228	1
CAPS2	-0.423219	0.108712	-3.89304	0.000130794	1
EIF3I	0.349304	0.0897718	3.89103	0.000131816	1
MMP26	-0.268729	0.0690806	-3.89007	0.0001323	1
BBS9	-0.394816	0.10153	-3.88866	0.000133022	1
EPN1	0.366189	0.0941995	3.88737	0.000133685	1
RANBP9	-0.366083	0.0942828	-3.88282	0.000136051	1
POLDIP2	0.31666	0.081562	3.88244	0.000136249	1
CCDC158	-0.307529	0.0792286	-3.88154	0.000136724	1
NIPBL	-0.378527	0.0976036	-3.87821	0.000138489	1
SDCCAG8	-0.644715	0.166267	-3.87759	0.000138822	1
KMT2B	0.340126	0.0877773	3.87487	0.000140279	1
KIAA0895	-0.533076	0.137606	-3.87395	0.000140778	1
PAN3	-0.507846	0.131186	-3.87118	0.000142283	1
PHAX	0.438994	0.113401	3.87115	0.000142301	1
NFATC2	0.425336	0.109881	3.87089	0.000142441	1
DZANK1	-0.63135	0.163317	-3.8658	0.000145254	1
SLC12A4	0.36105	0.0934606	3.86313	0.000146752	1
TRIM33	-0.511447	0.13251	-3.85967	0.00014871	1
BAIAP2L2	0.301305	0.0781165	3.85713	0.000150167	1
NEB	-0.373133	0.096814	-3.85412	0.000151907	1
BIN1	0.284995	0.0739604	3.85335	0.000152356	1
MAN2C1	0.370789	0.0962545	3.85217	0.000153045	1
ZDHHC17	-0.361022	0.09376	-3.85049	0.000154032	1
COLGALT2	-0.391887	0.101778	-3.85043	0.000154069	1
ZNF292	-0.348869	0.0906206	-3.84978	0.000154453	1
TLR5	0.446804	0.116189	3.8455	0.000157001	1
LHX3	0.274106	0.0712979	3.84452	0.000157589	1
CCDC102A	0.368306	0.0958206	3.84371	0.000158083	1
KIF23	-0.29206	0.0760126	-3.84225	0.000158962	1
CGGBP1	-0.366387	0.0954076	-3.84023	0.000160197	1
OAS3	0.299886	0.0781108	3.83923	0.000160806	1
RHOBTB2	0.463426	0.120722	3.83877	0.000161089	1
DTYMK	0.390008	0.101761	3.83258	0.00016494	1
AGL	-0.306271	0.079921	-3.83217	0.000165199	1
MYRF	0.272355	0.0711	3.83058	0.000166203	1
KIAA1024	-0.28495	0.0743958	-3.83019	0.000166449	1
EFCAB5	-0.40058	0.104674	-3.82692	0.000168541	1
HLTF	-0.48435	0.126599	-3.82585	0.000169228	1
ROM1	0.312946	0.0818032	3.8256	0.000169388	1
PHF21A	-0.620119	0.16211	-3.82529	0.000169592	1
MFSD9	-0.258497	0.0676133	-3.82317	0.000170961	1
PYGL	-0.314078	0.0821635	-3.82259	0.000171338	1
DNAJC3	-0.383364	0.100292	-3.82247	0.000171418	1
SLC35A5	-0.245274	0.0642175	-3.81943	0.000173412	1
GHRHR	0.372274	0.0974903	3.81858	0.000173975	1
MMP19	0.372266	0.0975037	3.81797	0.000174382	1
LNPEP	-0.371074	0.0972421	-3.81598	0.000175702	1
TDRD1	-0.479198	0.125583	-3.81578	0.000175838	1
MZT2B	0.345418	0.0906588	3.81009	0.000179676	1
ZNRF2	-0.333865	0.0876571	-3.80876	0.000180589	1
AGT	0.302158	0.0793937	3.80581	0.000182618	1
ETNK1	-0.314474	0.0826395	-3.80537	0.000182923	1
FBXL2	-0.593868	0.156113	-3.80409	0.000183817	1
NRXN1	-0.32979	0.0866989	-3.80385	0.00018398	1
TRIM9	-0.34278	0.0901147	-3.80382	0.000184002	1
KRT7	0.299064	0.0786224	3.80381	0.000184013	1
CYP26C1	0.271246	0.0714683	3.79534	0.000190012	1
KAT6A	-0.425117	0.112034	-3.79452	0.000190602	1
CDK2AP1	0.322318	0.0850044	3.79178	0.000192583	1
CSF1	0.346665	0.0915143	3.7881	0.000195282	1
YIF1A	0.325185	0.0858461	3.788	0.00019536	1
WDR41	-0.415108	0.1096	-3.78749	0.000195738	1
TNPO3	-0.4213	0.111288	-3.78567	0.000197083	1
MEX3D	0.273731	0.0723117	3.78543	0.000197265	1
DCDC2	-0.251735	0.0665317	-3.78368	0.000198574	1
NCAPH2	0.328332	0.086838	3.78097	0.000200612	1
BAZ2B	-0.331672	0.087745	-3.77995	0.000201387	1
ST5	0.493831	0.130705	3.7782	0.00020272	1
KXD1	0.428638	0.113481	3.77718	0.000203506	1
BRWD1	-0.592635	0.156933	-3.77635	0.000204141	1
KHDRBS2	-0.234204	0.0620328	-3.77549	0.000204806	1
HNRNPF	-0.480808	0.12735	-3.77548	0.000204809	1
LAP3	0.30011	0.0794986	3.77504	0.000205155	1
ACSM6	-0.273654	0.0725125	-3.77389	0.00020604	1
HIGD1B	0.44747	0.118584	3.77345	0.000206386	1
NDRG4	0.284761	0.0754648	3.77343	0.000206403	1
MSRA	-0.543588	0.144215	-3.76928	0.000209652	1
NOL9	0.478311	0.126945	3.76786	0.000210771	1
CTU1	0.432352	0.11478	3.7668	0.00021162	1
TEX30	-0.421583	0.111946	-3.76597	0.000212282	1
IKZF2	-0.217035	0.0576666	-3.76363	0.000214158	1
TMEM156	-0.367875	0.097766	-3.76281	0.000214813	1
SHOC2	-0.348745	0.0927025	-3.76199	0.000215483	1
B9D1	0.486425	0.129353	3.76044	0.000216739	1
NEO1	-0.365783	0.0973016	-3.75927	0.000217693	1
TCN2	0.453971	0.120763	3.75918	0.00021777	1
PIK3CA	-0.403185	0.107312	-3.75712	0.000219456	1
NCOA2	-0.447708	0.119182	-3.75652	0.000219951	1
CEP85	-0.443044	0.117967	-3.75565	0.000220669	1
TAB2	-0.382945	0.102004	-3.75423	0.000221856	1
CYP46A1	0.351876	0.0937574	3.75305	0.000222838	1
PUF60	0.302723	0.0806859	3.75187	0.000223828	1
NDOR1	0.316632	0.0844284	3.7503	0.000225148	1
DENND1B	-0.338231	0.0902274	-3.74865	0.000226541	1
PALB2	0.462074	0.123297	3.74765	0.000227396	1
SRSF5	0.571185	0.152417	3.74752	0.000227505	1
PCIF1	0.44061	0.11758	3.74731	0.000227686	1
VPS35	-0.250217	0.0667961	-3.74598	0.00022882	1
LIPJ	-0.270727	0.0722976	-3.74462	0.000229993	1
INHBA	-0.211554	0.0565557	-3.74064	0.000233444	1
LRRK2	-0.249864	0.0668637	-3.73692	0.000236719	1
TRAM2	0.518412	0.138768	3.73583	0.000237681	1
HCN3	0.305874	0.0818768	3.73579	0.000237721	1
WNT9B	0.441628	0.118247	3.73478	0.000238615	1
KLHL1	-0.253064	0.0677618	-3.73461	0.000238773	1
GGPS1	-0.363192	0.097297	-3.73282	0.000240375	1
PRDM10	-0.602164	0.161425	-3.7303	0.000242643	1
MTERF1	-0.385313	0.103429	-3.7254	0.000247127	1
DHRS12	0.553507	0.148623	3.72424	0.0002482	1
ASNS	-0.350626	0.0941693	-3.72336	0.000249009	1
TRHDE	-0.206044	0.0553565	-3.72213	0.000250155	1
E2F4	0.329474	0.0885531	3.72064	0.000251553	1
ATF7IP	-0.405334	0.108951	-3.72033	0.000251838	1
PLEKHG7	-0.41678	0.112033	-3.72017	0.000251989	1
FIG4	-0.288371	0.0775634	-3.71787	0.000254158	1
TGM2	0.363266	0.0977786	3.7152	0.000256704	1
SMC1B	-0.500914	0.134862	-3.71428	0.000257581	1
NMI	-0.349196	0.0940588	-3.71253	0.000259259	1
TMEM131	-0.431548	0.116284	-3.71117	0.000260577	1
SPESP1	-0.482697	0.130069	-3.71109	0.000260654	1
EED	-0.42802	0.115495	-3.70597	0.000265661	1
SP3	-0.263826	0.07121	-3.7049	0.000266725	1
EFNA5	-0.298244	0.0805218	-3.7039	0.000267718	1
DCHS1	0.454948	0.122869	3.70271	0.000268897	1
FEM1C	-0.22304	0.060243	-3.70233	0.000269281	1
LMCD1	0.215912	0.0583371	3.7011	0.00027051	1
METTL7B	0.324019	0.0876324	3.69748	0.000274169	1
PRKAA2	-0.284541	0.0769701	-3.69678	0.000274887	1
ANKAR	-0.446778	0.120858	-3.69672	0.000274939	1
OXSR1	-0.338079	0.0914648	-3.69627	0.000275401	1
ABLIM2	0.315042	0.085247	3.69563	0.000276053	1
GTF3C1	0.54164	0.146599	3.69469	0.000277019	1
KANSL1L	-0.404145	0.109398	-3.69427	0.000277454	1
NPEPL1	0.291839	0.079006	3.69388	0.00027785	1
CX3CL1	0.314575	0.0851809	3.69302	0.00027874	1
NNMT	0.382237	0.103548	3.69139	0.000280428	1
LDLRAP1	0.440043	0.119227	3.69079	0.000281055	1
IZUMO1	0.337155	0.0913908	3.68916	0.000282755	1
CTD-2410N18.5	0.495836	0.134431	3.68842	0.000283535	1
ZNF804B	-0.208306	0.0564837	-3.68789	0.000284088	1
CPTP	0.259922	0.0704831	3.68772	0.000284272	1
ABCF1	0.617423	0.167479	3.68657	0.000285476	1
PLAGL1	-0.365001	0.0990159	-3.68629	0.000285779	1
SHC1	0.407219	0.110469	3.68628	0.000285787	1
CD83	-0.368083	0.0998533	-3.68624	0.000285833	1
IL5RA	-0.317059	0.0860318	-3.68537	0.000286745	1
LACTB2	-0.407646	0.110677	-3.6832	0.000289057	1
AGO3	-0.452026	0.122728	-3.68315	0.000289117	1
EIF3K	0.510649	0.138665	3.68261	0.000289695	1
MRPL37	0.462825	0.125695	3.68214	0.000290196	1
PPP1R13B	0.410797	0.111584	3.6815	0.000290879	1
LRRC8A	0.374187	0.101644	3.68136	0.000291029	1
AP3S1	-0.238444	0.0647767	-3.68102	0.000291399	1
RP11-286N22.8	0.585863	0.159303	3.67766	0.000295044	1
CENPE	-0.231616	0.0630228	-3.67512	0.000297821	1
TESK2	-0.636904	0.173329	-3.67454	0.000298458	1
UBN2	-0.454716	0.123757	-3.67428	0.000298744	1
PCDH1	0.218298	0.0594539	3.67172	0.000301585	1
TPH1	-0.359237	0.0978406	-3.67166	0.000301651	1
SNTB1	-0.436072	0.118771	-3.67152	0.000301805	1
SAMD8	-0.582815	0.158763	-3.67098	0.000302409	1
AKT3	-0.354696	0.0967022	-3.66792	0.000305833	1
ZMIZ2	0.365187	0.0995773	3.66738	0.000306451	1
CDKN1A	0.401379	0.109528	3.66463	0.000309561	1
CXXC5	0.288652	0.0788086	3.6627	0.000311773	1
RNF17	-0.330532	0.0903055	-3.66016	0.000314705	1
TTC26	-0.3547	0.0969527	-3.65848	0.000316653	1
CCDC85C	0.204511	0.0559456	3.65554	0.000320098	1
WHSC1L1	-0.502113	0.137363	-3.65538	0.00032028	1
TBL1XR1	-0.484469	0.13255	-3.65498	0.000320759	1
RASGRP1	-0.259028	0.0709114	-3.65284	0.000323291	1
SLC48A1	0.41289	0.113048	3.65233	0.000323891	1
KIAA1715	-0.318126	0.0871111	-3.65195	0.000324343	1
NME5	-0.397629	0.108899	-3.65136	0.000325055	1
SDC3	0.284859	0.0782114	3.64216	0.00033621	1
IL15RA	0.4922	0.135266	3.63876	0.000340423	1
MRPL15	0.385451	0.105934	3.63858	0.000340656	1
TSGA10	-0.339997	0.0934767	-3.63724	0.000342333	1
AAK1	-0.514162	0.141583	-3.63153	0.000349554	1
ASZ1	-0.337147	0.0928662	-3.63046	0.000350923	1
BRIP1	-0.361635	0.0996245	-3.62998	0.000351541	1
GNPTG	0.321006	0.0884663	3.62857	0.000353358	1
SERTAD2	-0.492235	0.135671	-3.62816	0.00035389	1
FAM214B	0.350783	0.0967182	3.62686	0.000355578	1
C21orf62	-0.213976	0.0590053	-3.62639	0.000356182	1
SIPA1L1	-0.466045	0.128651	-3.62256	0.000361199	1
ESRP1	-0.221602	0.0611898	-3.62155	0.000362532	1
ROCK1	-0.378288	0.104463	-3.62126	0.00036292	1
LVRN	-0.165495	0.0457195	-3.6198	0.000364864	1
XYLT1	-0.257375	0.0711115	-3.61932	0.000365502	1
IFT22	0.280546	0.0775744	3.61647	0.000369315	1
CIRH1A	0.594331	0.164388	3.61542	0.000370739	1
COMMD5	0.421757	0.116667	3.61505	0.000371237	1
TBC1D5	-0.390235	0.108023	-3.6125	0.000374699	1
EBI3	0.361675	0.100137	3.61181	0.000375644	1
STAMBPL1	-0.225279	0.0623966	-3.61043	0.000377532	1
GAPT	-0.241708	0.0669521	-3.61017	0.000377897	1
EXOC3L1	0.26736	0.0740665	3.60973	0.0003785	1
VGLL3	-0.316393	0.0876669	-3.60904	0.000379455	1
DYRK1A	-0.390701	0.108286	-3.60804	0.000380838	1
UMPS	0.407244	0.112982	3.60449	0.000385782	1
LRRFIP2	-0.468016	0.129899	-3.60292	0.000387994	1
PTCHD3	-0.361039	0.100216	-3.60263	0.000388409	1
LRRC29	0.274188	0.0761257	3.60179	0.000389596	1
TMEM65	-0.357153	0.0991737	-3.60129	0.000390299	1
RHOH	-0.201198	0.0558826	-3.60037	0.000391613	1
CCDC144NL	-0.345732	0.0960556	-3.5993	0.000393139	1
TRIM28	0.337505	0.0937867	3.59864	0.000394073	1
PELI2	-0.296028	0.0822662	-3.59842	0.00039439	1
STT3B	-0.337458	0.0938086	-3.5973	0.000395996	1
TAOK2	0.327206	0.0909642	3.59709	0.000396305	1
FAM89A	0.38165	0.106132	3.596	0.000397874	1
LONP1	0.278902	0.0775628	3.59582	0.000398129	1
HS1BP3	0.372389	0.103589	3.59488	0.000399498	1
ANTXR2	-0.266908	0.0742467	-3.59487	0.000399502	1
MED13L	-0.350383	0.0974814	-3.59436	0.00040025	1
ZNF800	-0.397687	0.110664	-3.59365	0.000401285	1
SORBS3	0.332487	0.0925279	3.59338	0.000401679	1
RERE	-0.763935	0.21267	-3.59211	0.000403528	1
CBLN2	-0.276186	0.0769035	-3.59133	0.000404673	1
EPS15	-0.537104	0.149603	-3.5902	0.000406336	1
AFTPH	-0.438345	0.122193	-3.58732	0.000410594	1
UBXN2B	-0.319773	0.0891676	-3.5862	0.000412271	1
ACTR1B	0.380401	0.106196	3.58207	0.000418469	1
ESAM	0.290107	0.0810319	3.58016	0.000421381	1
ENPP5	-0.317273	0.0886233	-3.58002	0.000421594	1
ATP13A4	-0.209732	0.0585947	-3.57937	0.000422583	1
CEP63	-0.336857	0.0941416	-3.57819	0.00042439	1
CREB1	-0.402296	0.112437	-3.57797	0.000424728	1
XXbac-B562F10.12	0.324913	0.0908205	3.57753	0.000425406	1
KIAA1109	-0.284045	0.0794526	-3.57502	0.000429276	1
NDUFAB1	0.376933	0.105468	3.57392	0.000430992	1
CHD7	-0.294305	0.082391	-3.57206	0.0004339	1
APH1B	-0.427223	0.119636	-3.57103	0.000435514	1
PIK3CG	-0.284903	0.0797878	-3.57076	0.00043594	1

## Sheet: Table S7
Table S7. Top 500 differentially modified gene bodies between MM and its precursors in AA patients.
Symbol	Coefficient	Standard Error	t-value	p-value	FDR
SLC6A16	1.40567	0.259509	5.41665	3.56043e-07	0.00519289
GTPBP4	1.39426	0.261479	5.33219	5.16338e-07	0.00753028
ERCC3	1.4959	0.281077	5.32204	5.39807e-07	0.007872
TRRAP	1.43423	0.273768	5.23888	7.75754e-07	0.0113121
ALG8	1.32388	0.272504	4.85821	3.91613e-06	0.0571011
METTL2B	1.11028	0.232334	4.77882	5.44073e-06	0.0793259
WDR27	0.853447	0.180991	4.71542	7.05863e-06	0.102908
TEKT5	0.778433	0.168299	4.62528	1.01833e-05	0.148451
GPN1	0.901699	0.195622	4.60939	1.08584e-05	0.158284
LARP4	1.31255	0.285993	4.58945	1.17665e-05	0.171508
C1RL	-1.01115	0.224775	-4.49851	1.69282e-05	0.246728
GINM1	1.2393	0.278202	4.45469	2.0139e-05	0.293506
TANGO6	0.920432	0.208644	4.4115	2.38749e-05	0.347928
DNAJA3	1.13885	0.258769	4.40104	2.48752e-05	0.362481
ZNF565	0.848634	0.192893	4.39951	2.5025e-05	0.364639
RDH16	0.635327	0.145099	4.37858	2.71621e-05	0.395752
SEC31B	0.826604	0.189024	4.37301	2.77594e-05	0.404427
EMP2	0.595943	0.13636	4.37036	2.80488e-05	0.408615
PIP5K1A	0.913906	0.211319	4.32477	3.34948e-05	0.487919
BPNT1	1.05088	0.245573	4.27932	3.99298e-05	0.581618
STARD13	0.639518	0.149475	4.27843	4.00656e-05	0.583555
ZBTB7C	0.969311	0.227162	4.26705	4.18608e-05	0.609661
XPC	1.02942	0.242359	4.24749	4.51267e-05	0.657181
RAI14	0.362334	0.0854166	4.24197	4.6093e-05	0.671206
PRKDC	1.43625	0.340643	4.2163	5.08484e-05	0.740404
NDUFAB1	0.803191	0.191963	4.18408	5.7485e-05	0.836981
ZFYVE9	0.938588	0.224586	4.1792	5.85616e-05	0.852599
UBIAD1	1.18157	0.283782	4.16366	6.21154e-05	0.904276
PLAG1	-0.518313	0.125732	-4.12236	7.25968e-05	1
CTC-360G5.8	0.608558	0.147947	4.11334	7.51012e-05	1
HUS1	1.38198	0.336199	4.11059	7.58803e-05	1
DDX42	1.12485	0.273692	4.1099	7.60779e-05	1
AAMDC	0.936665	0.228108	4.10623	7.71329e-05	1
PRKCE	0.930764	0.226828	4.1034	7.79563e-05	1
SLC17A8	0.635139	0.155173	4.0931	8.10261e-05	1
XPNPEP3	1.17318	0.286881	4.08942	8.21506e-05	1
VPS25	-0.749155	0.184306	-4.06473	9.00877e-05	1
EAPP	0.668905	0.1647	4.06136	9.12272e-05	1
PSMD3	0.780441	0.193099	4.04165	9.81704e-05	1
GLRA1	0.741683	0.18362	4.03923	9.90588e-05	1
LETMD1	0.796564	0.197595	4.03129	0.00010202	1
TRIM66	1.00564	0.250363	4.01672	0.000107677	1
MDH2	0.823673	0.205069	4.01656	0.000107742	1
PUS1	0.83519	0.208159	4.01227	0.000109466	1
PCGF6	0.814089	0.203438	4.00165	0.000113846	1
GBF1	1.40435	0.351437	3.99601	0.000116238	1
SPTY2D1	0.747884	0.187718	3.98408	0.000121464	1
HIF3A	0.669603	0.168317	3.97822	0.00012411	1
SCNN1B	0.699206	0.175866	3.97579	0.000125226	1
TBCE	1.28046	0.32314	3.96257	0.000131453	1
TYW1B	1.16812	0.295541	3.9525	0.000136396	1
PTPRM	0.305962	0.0775081	3.94749	0.00013892	1
CAPN8	0.714056	0.180941	3.94635	0.000139502	1
TET1	1.23293	0.312703	3.94281	0.000141317	1
VCL	-0.82257	0.209057	-3.93466	0.000145588	1
ALDH2	0.588015	0.149791	3.92558	0.000150492	1
NNMT	0.703758	0.179511	3.92041	0.000153355	1
SYCP2	-0.57455	0.146694	-3.91665	0.000155466	1
SF3B3	1.17653	0.301172	3.90651	0.000161306	1
EXOSC10	0.995555	0.255365	3.89855	0.000166037	1
BTNL2	-0.66093	0.170235	-3.88246	0.000176009	1
TIMM10B	0.885864	0.229292	3.86348	0.0001885	1
ANGPTL6	-0.728466	0.188598	-3.86254	0.000189139	1
OGG1	-1.0281	0.266243	-3.86152	0.000189839	1
MTOR	0.920793	0.238541	3.86011	0.000190806	1
TPMT	0.862281	0.223816	3.85264	0.000196013	1
GLOD4	0.966261	0.250912	3.851	0.000197173	1
GSG1L2	0.550615	0.143111	3.84748	0.000199687	1
CCDC86	-0.677037	0.176588	-3.834	0.000209592	1
USP13	1.34419	0.351459	3.82461	0.00021677	1
TACC2	0.427475	0.11187	3.82117	0.000219463	1
ACAD10	1.154	0.302555	3.81418	0.000225023	1
KIAA0907	1.05139	0.275862	3.81128	0.000227366	1
UBA2	1.14653	0.300891	3.81044	0.000228046	1
NFS1	0.837604	0.219903	3.80896	0.000229255	1
THAP8	0.937848	0.246319	3.80745	0.000230502	1
STK35	1.0443	0.274997	3.7975	0.000238833	1
ZNF619	0.617252	0.162552	3.79725	0.000239042	1
SOBP	0.838688	0.221212	3.79133	0.000244144	1
OLFM3	-0.267108	0.070695	-3.77831	0.00025572	1
IL26	-0.593514	0.157181	-3.776	0.000257826	1
ATP13A4	-0.377316	0.100379	-3.7589	0.000273956	1
KCNA2	-0.553603	0.147323	-3.75775	0.000275072	1
SMLR1	0.685028	0.182345	3.75677	0.000276028	1
CYB561A3	-0.890366	0.237113	-3.75503	0.000277732	1
IQCK	0.833909	0.222233	3.7524	0.000280329	1
DIXDC1	1.01063	0.269401	3.75139	0.000281332	1
RNF122	-0.747254	0.199259	-3.75017	0.000282552	1
ADAMTS17	0.291347	0.0778586	3.74201	0.00029082	1
BCL2L11	0.848177	0.226696	3.74148	0.000291363	1
ADIG	0.781193	0.208948	3.73869	0.000294243	1
TNNC2	-0.790907	0.211615	-3.73749	0.000295493	1
PTPN9	1.14526	0.306465	3.737	0.000296003	1
GMNN	-0.700623	0.187642	-3.73383	0.00029933	1
ABCF2	0.958186	0.256903	3.72976	0.000303657	1
TMEM192	0.647729	0.174167	3.719	0.000315381	1
FMO2	0.466608	0.125575	3.71579	0.000318967	1
DUSP22	-0.461384	0.124224	-3.71414	0.000320818	1
C5orf49	0.655862	0.176799	3.70964	0.000325927	1
ZNF623	1.04679	0.282835	3.70107	0.00033587	1
AHCTF1	-0.818796	0.22172	-3.69293	0.000345588	1
NQO1	0.864599	0.235328	3.67401	0.000369209	1
SAXO1	0.699458	0.190726	3.66735	0.000377887	1
PARP11	-0.911657	0.248832	-3.66374	0.000382667	1
INO80	1.45305	0.39663	3.6635	0.000382988	1
LRRC55	0.523545	0.14322	3.65554	0.00039374	1
WDR59	1.05621	0.290203	3.63954	0.000416225	1
XYLB	0.802811	0.220595	3.6393	0.000416572	1
MSMO1	-0.742058	0.204023	-3.63714	0.000419705	1
CTD-3105H18.18	0.706264	0.194366	3.63369	0.000424754	1
C8orf44-SGK3	0.994918	0.273922	3.63212	0.000427056	1
FAN1	1.00534	0.276893	3.6308	0.000429019	1
MTPAP	1.4173	0.390716	3.62744	0.000434039	1
WASF3	-0.313759	0.0865604	-3.62475	0.000438096	1
CS	0.592369	0.163451	3.62414	0.000439019	1
HEATR4	0.616169	0.170021	3.62407	0.000439119	1
HRASLS	-0.304856	0.0841238	-3.6239	0.000439379	1
CENPU	-0.715969	0.197668	-3.62207	0.000442163	1
ARMC8	-0.830718	0.22971	-3.61638	0.000450939	1
WDR73	0.903923	0.250342	3.61076	0.000459775	1
MRVI1	-0.575571	0.159793	-3.60198	0.000473893	1
POLN	1.05626	0.294106	3.59141	0.000491428	1
UBC	-0.525253	0.146349	-3.58904	0.000495435	1
IARS	0.852421	0.238665	3.57162	0.000525924	1
LEXM	0.735227	0.205928	3.57031	0.000528286	1
NOS1	0.476793	0.133672	3.56688	0.000534521	1
EVL	-1.13233	0.317597	-3.56532	0.00053738	1
TOMM20L	0.939208	0.26363	3.56259	0.000542414	1
IPO5	0.806227	0.226635	3.55739	0.000552146	1
NT5C3A	-0.767648	0.216015	-3.55369	0.000559161	1
NUDT21	0.825187	0.232262	3.55282	0.000560806	1
C1orf54	0.77907	0.219457	3.54999	0.000566258	1
ALDH1B1	0.529598	0.149574	3.54071	0.000584425	1
RNF40	0.685303	0.193804	3.53606	0.000593742	1
ZNF142	0.970645	0.275882	3.51833	0.000630553	1
DOCK9	0.569458	0.161867	3.51805	0.000631162	1
ITGA7	0.73996	0.21062	3.51325	0.000641495	1
MYH14	0.402349	0.114581	3.51147	0.000645371	1
HIRA	0.517825	0.147592	3.50849	0.000651917	1
PRPF3	0.667511	0.190372	3.50635	0.000656641	1
OTUD7B	0.911276	0.260054	3.50418	0.000661477	1
RAD1	0.621948	0.177769	3.49864	0.000673979	1
LRRC8D	-0.573557	0.163957	-3.49821	0.000674952	1
NWD2	0.468716	0.134073	3.49598	0.00068004	1
YIPF1	0.85641	0.245381	3.49013	0.000693594	1
MED1	0.840659	0.240887	3.48984	0.00069426	1
ALG14	0.868598	0.248947	3.48908	0.000696039	1
PAK1IP1	0.761173	0.218722	3.4801	0.000717413	1
CNDP1	0.617478	0.177476	3.47923	0.000719511	1
CYP4B1	0.508925	0.146422	3.47575	0.000727968	1
CEP89	1.00319	0.289257	3.46817	0.000746739	1
MLXIP	-0.907672	0.261959	-3.46494	0.000754859	1
EIF3K	0.858898	0.248215	3.4603	0.000766698	1
MAGOH	0.603342	0.174617	3.45523	0.000779813	1
PTCD3	0.690033	0.199824	3.4532	0.000785128	1
FXYD7	-0.725382	0.210073	-3.45299	0.000785674	1
ENTHD1	-0.434749	0.126029	-3.44961	0.000794619	1
ST5	0.899965	0.26095	3.4488	0.000796766	1
C17orf53	0.911108	0.264245	3.44796	0.000799	1
PDILT	0.442337	0.128378	3.44558	0.000805369	1
NOL9	0.933759	0.271182	3.44329	0.000811563	1
ATP13A5	-0.262078	0.076174	-3.44052	0.000819102	1
HEXIM2	-0.472174	0.137248	-3.4403	0.000819694	1
SESN2	0.885945	0.258058	3.43312	0.000839556	1
SEC11C	0.6594	0.19209	3.43277	0.000840531	1
C12orf10	0.599132	0.174538	3.43268	0.00084079	1
ENY2	-0.655048	0.19094	-3.43065	0.00084649	1
NAA11	-0.47283	0.137901	-3.42877	0.00085181	1
APBB2	0.435717	0.127094	3.4283	0.000853137	1
IL1RL2	0.660093	0.19258	3.42763	0.000855048	1
SUPV3L1	0.597633	0.174367	3.42744	0.000855579	1
SSBP1	0.717333	0.209306	3.4272	0.000856267	1
HLCS	0.881514	0.257609	3.42191	0.00087147	1
COL24A1	-0.425179	0.124444	-3.41663	0.000886884	1
FAM171A1	0.54511	0.159647	3.41448	0.000893229	1
TEFM	0.667455	0.195596	3.41241	0.000899383	1
CRKL	-0.774977	0.227138	-3.41192	0.000900851	1
NAA25	1.37205	0.402413	3.40955	0.000907951	1
ADAMTS12	0.342849	0.100729	3.40368	0.000925798	1
PDSS2	0.999342	0.293622	3.4035	0.000926335	1
BCL2L14	0.774362	0.227535	3.40326	0.000927093	1
NCKAP5	0.229759	0.0675128	3.40319	0.000927301	1
DCAF7	0.812034	0.239043	3.39702	0.000946424	1
C18orf21	0.671256	0.19762	3.39669	0.00094745	1
SLC6A2	0.565621	0.166602	3.39503	0.000952671	1
SLC6A11	-0.372228	0.109692	-3.39341	0.000957791	1
DCXR	-0.566708	0.167034	-3.39278	0.000959789	1
CDH9	-0.328234	0.0967776	-3.39163	0.000963436	1
KIF16B	0.639769	0.188634	3.39159	0.000963576	1
NLGN1	-0.350525	0.103359	-3.39133	0.000964382	1
FRMD1	0.327809	0.0967168	3.38937	0.000970653	1
ZNF250	0.766255	0.226085	3.38923	0.000971119	1
PRKG2	-0.422895	0.124817	-3.38812	0.000974685	1
ITPRIPL1	0.616995	0.182137	3.38754	0.00097655	1
ATL1	-0.549454	0.162234	-3.38679	0.000978968	1
NR2C1	0.761148	0.224783	3.38614	0.00098105	1
MROH2B	0.258131	0.07631	3.38266	0.000992389	1
YAP1	0.307319	0.0908892	3.38125	0.000997009	1
ADAMTSL1	0.301385	0.0891447	3.38085	0.000998328	1
CMIP	-0.958232	0.283744	-3.3771	0.00101074	1
XXbac-BPG32J3.20	-0.440156	0.13043	-3.37465	0.00101893	1
TMC7	0.680116	0.201546	3.3745	0.00101942	1
CTD-3148I10.9	-0.643172	0.190612	-3.37425	0.00102026	1
ARHGAP44	0.428725	0.12709	3.37339	0.00102318	1
SERPINB9	-0.732573	0.217197	-3.37285	0.00102498	1
ABCA4	1.28083	0.380236	3.36851	0.00103971	1
ACSM2B	0.314236	0.0933598	3.36586	0.00104881	1
C6orf203	0.835573	0.24825	3.36585	0.00104885	1
EIF2D	0.803156	0.238793	3.3634	0.00105734	1
CWC25	0.641644	0.190927	3.36067	0.00106684	1
FRMD4B	-0.807537	0.240394	-3.35922	0.00107195	1
ITPKB	-0.583174	0.173629	-3.35874	0.00107363	1
ZNF441	0.549669	0.163774	3.35628	0.00108234	1
ATP6V0A2	-0.675187	0.201178	-3.35617	0.00108272	1
EXOSC7	0.689857	0.205973	3.34926	0.00110752	1
ZDHHC16	0.79798	0.238396	3.34728	0.00111471	1
POLR3A	0.972882	0.290703	3.34665	0.00111702	1
CIRH1A	1.08539	0.324385	3.34601	0.00111936	1
FUT10	1.04879	0.313561	3.34477	0.00112392	1
SSC4D	-0.553934	0.165761	-3.34177	0.00113501	1
RET	-0.594434	0.177899	-3.34141	0.00113633	1
RPUSD4	0.573359	0.171638	3.34052	0.00113964	1
ASRGL1	-0.681279	0.204183	-3.33662	0.00115427	1
DCT	-0.562988	0.168749	-3.33625	0.00115568	1
EPB41L4B	0.505402	0.151625	3.33323	0.0011671	1
CALCOCO2	0.635451	0.19082	3.3301	0.00117909	1
MED29	-0.650669	0.195602	-3.32649	0.00119304	1
AMMECR1L	1.01027	0.303721	3.32632	0.00119371	1
RAPGEF4	0.590699	0.177658	3.32492	0.00119916	1
SESTD1	-0.699797	0.210616	-3.32262	0.00120821	1
NDUFV3	0.814936	0.245335	3.32172	0.00121173	1
XXYLT1	-0.734672	0.221531	-3.31633	0.00123318	1
CPEB3	0.926509	0.279549	3.3143	0.00124136	1
PLCXD3	0.284803	0.0859341	3.3142	0.00124175	1
ZNF804A	-0.401356	0.121114	-3.31386	0.00124314	1
NHSL1	0.638704	0.192752	3.3136	0.00124419	1
NEK8	-0.681179	0.205815	-3.30967	0.00126018	1
EFNA1	-0.516168	0.156013	-3.30849	0.001265	1
SEMA4D	-0.587982	0.177776	-3.30743	0.00126936	1
VPRBP	1.20031	0.362987	3.30675	0.00127218	1
CD84	-0.498928	0.151001	-3.30414	0.001283	1
SUCLG2	0.34366	0.104014	3.30398	0.00128369	1
CDH4	-0.279075	0.0844669	-3.30396	0.00128374	1
SH3RF2	0.757363	0.229301	3.30292	0.00128811	1
ASCC1	1.34529	0.40747	3.30157	0.00129376	1
TAOK1	-0.755606	0.228915	-3.30081	0.00129692	1
CEACAM19	0.688191	0.208525	3.30028	0.00129919	1
DAPP1	-0.454014	0.13762	-3.29903	0.00130443	1
MYO1B	0.418984	0.127043	3.29797	0.00130893	1
CEP95	0.860504	0.261303	3.29312	0.00132965	1
ZNF248	0.499757	0.151767	3.29293	0.00133047	1
INTS2	0.838724	0.254715	3.29279	0.00133105	1
STK24	-0.865661	0.262953	-3.29208	0.00133415	1
TGM6	0.614117	0.186647	3.29026	0.00134201	1
PCDH1	0.417767	0.126989	3.2898	0.00134403	1
OOEP	0.832161	0.253369	3.28438	0.00136777	1
SLC26A3	0.597944	0.182112	3.28339	0.00137216	1
CAPN14	-0.435377	0.13265	-3.28216	0.00137763	1
ALDH7A1	0.512576	0.156218	3.28116	0.00138209	1
DGKD	-0.695541	0.212051	-3.28006	0.00138697	1
MTCH2	0.747111	0.227851	3.27895	0.00139198	1
PSKH1	0.795375	0.242589	3.2787	0.00139311	1
NDUFA12	0.888934	0.271501	3.27414	0.00141371	1
KMT2C	-1.01446	0.309906	-3.27345	0.00141689	1
BFAR	0.968437	0.296536	3.26583	0.00145208	1
ZC3H14	0.619249	0.189724	3.26394	0.00146093	1
SNRPC	0.794429	0.243481	3.26279	0.00146635	1
FCF1	0.65883	0.201941	3.26249	0.00146778	1
SNX20	-0.628823	0.192767	-3.26209	0.00146968	1
ALDH3A2	0.76799	0.235549	3.26043	0.00147754	1
CKAP2L	-0.594034	0.18225	-3.25945	0.00148217	1
THBS2	0.498605	0.153139	3.25589	0.00149925	1
ZNF558	0.519142	0.15953	3.2542	0.00150742	1
RWDD4	0.765952	0.235402	3.25381	0.00150931	1
IRS2	-0.611985	0.188145	-3.25274	0.0015145	1
CADPS2	0.247251	0.0760302	3.25202	0.00151801	1
SIGLEC8	-0.537122	0.165168	-3.25198	0.0015182	1
RNF212B	-0.592135	0.1821	-3.25171	0.00151951	1
DSG1	0.306462	0.0943199	3.24918	0.0015319	1
CYP2A13	0.579617	0.178431	3.24841	0.00153565	1
FBXL20	-1.14683	0.353045	-3.24838	0.00153581	1
CFAP61	-0.566272	0.174534	-3.24448	0.00155513	1
LIMD1	-1.3265	0.409133	-3.24221	0.00156646	1
LRRC3B	0.300335	0.0926785	3.24061	0.00157451	1
TLR10	-0.566017	0.174707	-3.23981	0.00157855	1
DTYMK	0.674842	0.208326	3.23935	0.00158088	1
SERPINA9	0.30898	0.0953853	3.23928	0.00158123	1
TRIM15	-0.501786	0.154919	-3.23903	0.00158254	1
ELAC2	0.69661	0.215092	3.23867	0.00158436	1
NEU3	0.873161	0.269671	3.23788	0.00158835	1
ZNF19	0.591201	0.182974	3.23106	0.00162335	1
TNFRSF10A	0.506216	0.156674	3.23102	0.00162359	1
SLC2A9	0.931274	0.288802	3.22461	0.00165711	1
ASTN1	0.330263	0.102423	3.22449	0.00165779	1
PRPF4	0.551773	0.171169	3.22355	0.00166274	1
NOB1	0.643071	0.199656	3.22089	0.00167689	1
PACS1	-0.770417	0.239212	-3.22065	0.0016782	1
MGMT	0.542952	0.168609	3.22019	0.00168065	1
CADM1	0.222	0.0689485	3.21979	0.00168281	1
PRKACB	-0.543932	0.169047	-3.21763	0.00169443	1
PIGR	-0.647754	0.201611	-3.2129	0.00172015	1
DBN1	-0.49251	0.153295	-3.21283	0.0017205	1
SZT2	0.904028	0.281444	3.21211	0.00172446	1
HACL1	0.716555	0.22321	3.21022	0.00173484	1
SNRNP200	0.664232	0.206988	3.20904	0.00174137	1
DDX25	0.632173	0.197098	3.20741	0.00175043	1
SEC24A	0.58314	0.181817	3.20729	0.00175109	1
MYEOV2	0.705867	0.220188	3.20575	0.00175967	1
ATP2A3	-0.496418	0.154974	-3.20323	0.00177384	1
NUP85	0.797001	0.248821	3.20311	0.00177448	1
SERPINA12	0.288224	0.0900018	3.20242	0.00177838	1
PSMG2	1.08509	0.339908	3.19232	0.00183628	1
PTPN21	0.57459	0.180126	3.18994	0.00185017	1
ZNF683	-0.542741	0.170305	-3.18688	0.00186817	1
ABCC12	0.496826	0.156035	3.18407	0.00188486	1
PSMA4	0.653448	0.20566	3.17732	0.00192552	1
ADARB1	-0.572117	0.180113	-3.17644	0.00193085	1
MTHFSD	0.695682	0.219405	3.17076	0.00196577	1
LMLN	-0.56711	0.178994	-3.16832	0.00198095	1
TUBGCP5	0.829093	0.261944	3.16515	0.0020008	1
TAB1	-0.872636	0.275799	-3.16403	0.00200793	1
ADRA2A	-0.403476	0.127656	-3.16065	0.00202937	1
IPPK	0.830349	0.262781	3.15985	0.0020345	1
ICAM5	-0.331813	0.105144	-3.15578	0.00206068	1
PITPNC1	-0.819308	0.259635	-3.15561	0.00206178	1
FHL3	-0.584593	0.185375	-3.15357	0.00207508	1
POLR1E	0.604583	0.19178	3.15249	0.00208213	1
SERPINE2	-0.46938	0.148919	-3.15191	0.00208591	1
CLHC1	-0.764554	0.242578	-3.15178	0.00208672	1
RUFY4	-0.517094	0.16417	-3.14974	0.00210016	1
DAPL1	0.628437	0.199536	3.14948	0.00210185	1
SMCO4	0.430754	0.136775	3.14935	0.00210272	1
EARS2	0.509787	0.161927	3.14825	0.00210999	1
BET1	-0.410609	0.130431	-3.14808	0.0021111	1
SLC9A1	-0.69002	0.219214	-3.14771	0.0021136	1
GEMIN2	0.614588	0.195513	3.14347	0.00214188	1
ACTR5	0.861048	0.274002	3.14249	0.00214847	1
CHCHD10	-0.564402	0.179655	-3.1416	0.00215448	1
SUMF2	0.733217	0.233424	3.14113	0.0021576	1
CNTNAP2	-0.352873	0.112388	-3.13977	0.00216681	1
SIPA1L2	0.343298	0.109357	3.13924	0.00217046	1
UBFD1	0.528254	0.168309	3.1386	0.00217481	1
TRIM67	0.670481	0.213641	3.13835	0.00217646	1
MYO6	0.384726	0.122866	3.13128	0.00222518	1
POLR1C	0.715876	0.228655	3.13082	0.00222838	1
C2orf42	1.02938	0.328944	3.12936	0.00223858	1
MC2R	0.46973	0.1502	3.12735	0.00225264	1
NINL	0.387145	0.123894	3.12481	0.00227057	1
LMTK3	-0.474777	0.151998	-3.12358	0.00227935	1
HSD17B13	0.620604	0.198721	3.123	0.00228347	1
DOCK4	0.482634	0.154614	3.12155	0.00229379	1
GRAP2	-0.468428	0.150128	-3.12019	0.00230352	1
HTATIP2	0.761438	0.244077	3.11966	0.00230736	1
RIN3	-0.684175	0.219313	-3.11963	0.00230757	1
LAP3	0.46029	0.147666	3.11709	0.00232588	1
RSPH14	-0.509636	0.16362	-3.11475	0.00234295	1
LPA	0.206968	0.0664487	3.1147	0.00234329	1
CRYBG3	0.366001	0.117526	3.1142	0.00234692	1
TPCN1	-0.829126	0.266263	-3.11393	0.0023489	1
MED12L	-0.474717	0.152486	-3.11318	0.00235444	1
ACAT2	0.574083	0.184428	3.11277	0.0023574	1
TTLL8	-0.446287	0.143403	-3.11213	0.00236215	1
GIMAP5	0.339411	0.109062	3.11209	0.00236244	1
CASS4	-0.518416	0.166614	-3.11148	0.00236691	1
QDPR	0.916357	0.294652	3.10997	0.00237807	1
EIF4E2	0.67015	0.215486	3.10994	0.00237824	1
SLC47A2	0.687968	0.221307	3.10865	0.00238781	1
MGLL	-0.834978	0.26868	-3.10771	0.00239484	1
SCO1	0.66547	0.214215	3.10655	0.0024035	1
FAM98B	-0.52282	0.168333	-3.10587	0.00240858	1
ADAMTS16	0.266007	0.0857533	3.102	0.00243766	1
CYP3A4	0.33808	0.108997	3.10173	0.00243972	1
NOP58	0.854398	0.275605	3.10008	0.00245224	1
C9orf57	0.410753	0.132533	3.09926	0.00245851	1
RNF185	0.684073	0.220756	3.09878	0.00246221	1
PIH1D2	0.425601	0.137474	3.09586	0.00248462	1
ZNF445	0.896981	0.289836	3.09479	0.00249283	1
RBP1	0.553274	0.178807	3.09426	0.00249697	1
CA11	0.602266	0.194706	3.09321	0.0025051	1
HPSE	-0.436137	0.141038	-3.09233	0.00251189	1
DNAJC7	0.570648	0.184563	3.09189	0.00251536	1
SNTN	0.396055	0.128199	3.08937	0.00253507	1
ADGRE1	-0.542536	0.175647	-3.08878	0.00253969	1
LAT	-0.41975	0.135939	-3.08779	0.00254746	1
ERBB2IP	-0.627984	0.203425	-3.08705	0.00255332	1
RP11-697E2.12	-1.22972	0.3984	-3.08665	0.00255646	1
BAIAP2L1	0.358452	0.116162	3.08578	0.00256338	1
CCDC150	0.752093	0.24379	3.085	0.00256955	1
GALNT6	-0.618003	0.200521	-3.08199	0.00259362	1
KLHL6	-0.994262	0.322641	-3.08163	0.00259646	1
ASIC4	-0.315484	0.102392	-3.08114	0.00260041	1
ING5	-0.433958	0.140879	-3.08036	0.00260668	1
RFC5	0.666684	0.216513	3.07919	0.00261611	1
MYOZ1	0.703629	0.228516	3.07912	0.00261669	1
RCAN3	-0.554974	0.180265	-3.07865	0.00262049	1
CSF1R	-0.519737	0.168852	-3.07806	0.00262528	1
BMP2K	-0.586946	0.190703	-3.0778	0.00262738	1
NPHS1	0.622378	0.202303	3.07646	0.00263825	1
TRIM52	0.710541	0.231057	3.07517	0.00264881	1
IZUMO1	-0.563037	0.183206	-3.07324	0.00266465	1
SQRDL	0.39205	0.127602	3.07244	0.00267121	1
TLDC1	-0.578182	0.18829	-3.07071	0.00268553	1
RASA3	-0.466526	0.151932	-3.07063	0.00268618	1
MACC1	-0.403404	0.13138	-3.0705	0.00268727	1
SLC22A3	0.238407	0.0776484	3.07034	0.00268856	1
DUOXA1	-0.541633	0.176539	-3.06806	0.00270754	1
HTR2A	-0.428184	0.13966	-3.0659	0.00272563	1
ONECUT2	0.271104	0.0884327	3.06565	0.00272774	1
LRIT1	0.575593	0.187955	3.0624	0.00275515	1
TRIM63	-0.562041	0.183577	-3.06161	0.00276184	1
FBXO15	-0.499431	0.163197	-3.06029	0.00277306	1
GCN1	0.876142	0.286366	3.05952	0.0027797	1
MTMR14	1.12933	0.369131	3.05943	0.00278044	1
SUCNR1	-0.483392	0.158053	-3.05841	0.00278915	1
CREBL2	0.725975	0.237408	3.05793	0.00279333	1
CATSPER1	-0.398295	0.130277	-3.05729	0.00279882	1
NUP133	0.956112	0.312742	3.05719	0.00279964	1
CCRL2	-0.602151	0.19698	-3.05692	0.00280196	1
BRD8	0.740381	0.24223	3.05652	0.00280541	1
TRIM9	-0.706877	0.231303	-3.05607	0.00280934	1
URB1	0.981204	0.321218	3.05464	0.00282172	1
STAM	-0.642126	0.210239	-3.05426	0.00282498	1
SRRM4	0.34665	0.113525	3.05352	0.00283136	1
STC2	0.546829	0.179232	3.05096	0.00285379	1
ZDHHC5	0.885645	0.290356	3.05021	0.00286034	1
DNAJB8	-0.428872	0.140785	-3.04629	0.00289496	1
MCC	0.348189	0.11433	3.04548	0.00290211	1
ARHGAP32	-0.401232	0.131761	-3.04516	0.00290499	1
TGDS	0.619192	0.203362	3.04478	0.00290833	1
LHX2	0.567488	0.186385	3.0447	0.00290906	1
RPL26L1	0.561657	0.184511	3.04403	0.00291504	1
ABI1	-0.549972	0.180683	-3.04385	0.00291669	1
PCYOX1	0.800465	0.263121	3.04219	0.00293154	1
CDIP1	-0.531945	0.174938	-3.04076	0.00294443	1
NRGN	-0.385794	0.126935	-3.03931	0.00295746	1
DACT2	0.261509	0.0860733	3.03821	0.0029675	1
MED24	0.597703	0.196868	3.03606	0.00298708	1
TXNDC15	0.721728	0.237737	3.03582	0.00298923	1
PRSS55	0.581531	0.191585	3.03537	0.00299341	1
CDCA5	0.624257	0.205679	3.0351	0.00299585	1
KIF18A	-0.312428	0.102966	-3.03428	0.00300333	1
GRIN2A	0.321122	0.106045	3.02816	0.0030601	1
C1orf174	-0.605275	0.199916	-3.02764	0.00306492	1
CSRNP2	0.792412	0.26177	3.02713	0.00306968	1
SNIP1	0.552321	0.182482	3.02672	0.00307356	1
PRR5L	-0.542502	0.179257	-3.02639	0.00307667	1
RHOF	-0.600415	0.19844	-3.02568	0.00308333	1
TPM4	-0.55169	0.18235	-3.02544	0.00308557	1
CDK1	-0.429508	0.141975	-3.02523	0.00308754	1
PCP4	0.36862	0.121849	3.02523	0.00308757	1
MAPKAPK5	0.608254	0.201079	3.02495	0.00309018	1
LGMN	-0.387075	0.127971	-3.0247	0.00309251	1
CLCNKB	-0.391002	0.129272	-3.02465	0.00309301	1
ZNF91	0.301798	0.0997825	3.02456	0.00309386	1
PPHLN1	-0.616733	0.203932	-3.02421	0.00309716	1
MMRN1	-0.259757	0.0859116	-3.02354	0.00310355	1
UAP1	0.533302	0.176593	3.01995	0.00313762	1
UBA3	-0.608683	0.201576	-3.01962	0.00314084	1
ARHGAP18	-0.549523	0.182042	-3.01866	0.00315005	1
DSN1	0.646812	0.214287	3.01844	0.00315218	1
VPS33B	0.820549	0.271962	3.01714	0.0031646	1
DNASE2B	-0.571769	0.18951	-3.01709	0.00316513	1
AARS	0.671417	0.22259	3.01638	0.00317198	1
RHPN2	0.405531	0.134452	3.01618	0.00317394	1
AOX1	0.58929	0.195441	3.01519	0.00318352	1
KSR2	0.346943	0.115084	3.01469	0.00318835	1
ELOVL7	-0.297327	0.0986283	-3.01462	0.00318898	1
TAF1A	0.498974	0.165666	3.01193	0.00321523	1
MLIP	0.264705	0.0879247	3.01059	0.00322835	1
CYB5A	0.852739	0.2834	3.00896	0.00324444	1
R3HCC1	0.698795	0.232322	3.00787	0.00325515	1
SDHC	0.824329	0.274061	3.00783	0.00325559	1
MREG	0.580499	0.193049	3.00701	0.00326371	1
MYH8	0.342208	0.113841	3.00601	0.00327362	1
RAB6A	1.05187	0.349944	3.00581	0.00327559	1
CTTN	-0.395702	0.131778	-3.00279	0.00330582	1
MANEAL	0.574602	0.191437	3.00153	0.00331849	1
PIGT	0.555637	0.18515	3.00101	0.00332373	1
BBOF1	0.669083	0.223043	2.9998	0.00333595	1
POC1A	-0.465882	0.155312	-2.99966	0.00333736	1
SERPINI1	-0.575549	0.191875	-2.9996	0.00333789	1
SEPN1	-0.564332	0.188158	-2.99925	0.00334147	1
NCAPG2	-0.543659	0.181279	-2.99903	0.00334376	1
FAM134C	0.568755	0.189774	2.99701	0.00336423	1
ECE1	-0.692533	0.231236	-2.99491	0.0033857	1
SPRED3	-0.470895	0.157255	-2.99446	0.00339032	1
MPP7	-0.434781	0.14535	-2.99127	0.00342328	1
TDGF1	0.740837	0.247751	2.99025	0.00343382	1
PPCDC	-0.663903	0.222531	-2.98342	0.0035055	1
ACTN1	-0.65169	0.218761	-2.97901	0.0035525	1
CHRNA9	0.684984	0.230051	2.97753	0.0035684	1
ARFGEF2	1.33145	0.447218	2.97719	0.00357208	1
DSC2	0.294666	0.099033	2.97543	0.00359106	1
CATSPERB	-0.363163	0.122098	-2.97437	0.00360265	1
UTP6	0.553852	0.186376	2.97169	0.00363188	1
CLEC1B	-0.438239	0.147492	-2.97127	0.00363645	1
CD79B	-0.518798	0.174609	-2.9712	0.00363718	1
MFSD1	-0.69545	0.234173	-2.96981	0.00365243	1
OTOP1	0.655344	0.220768	2.96847	0.00366718	1
ZNF862	-0.635803	0.214244	-2.96765	0.00367623	1

## Sheet: Table S8
Table S8. Enriched KEGG pathways among differentially modified genes between MM and its precursors in different populations.
	KEGG ID	Description	p-value	Adjusted p-value	Count	Symbol
EA	hsa05223	Non-small cell lung cancer	4.09071e-05	0.0106359	9	DDB2/SOS2/KIF5C/KIF5C/STK4/BRAF/EML4/PIK3CA/AKT3/AKT3/CDKN1A
	hsa04931	Insulin resistance	0.000913738	0.0959245	9	RPS6KA2/NR1H3/IRS2/PYGL/AGT/PIK3CA/PRKAA2/AKT3/AKT3/CREB1
	hsa04115	p53 signaling pathway	0.00150487	0.0959245	7	DDB2/FAS/CCNG2/SESN3/SESN1/CHEK1/CDKN1A
	hsa05214	Glioma	0.00176288	0.0959245	7	DDB2/SOS2/BRAF/PIK3CA/SHC1/AKT3/AKT3/CDKN1A
	hsa05220	Chronic myeloid leukemia	0.00190414	0.0959245	7	DDB2/SOS2/BRAF/PIK3CA/SHC1/AKT3/AKT3/CDKN1A
	hsa05213	Endometrial cancer	0.00221364	0.0959245	6	DDB2/SOS2/BRAF/PIK3CA/AKT3/AKT3/CDKN1A
	hsa04068	FoxO signaling pathway	0.00349182	0.117788	9	SOS2/CCNG2/STK4/BRAF/IRS2/PIK3CA/PRKAA2/AKT3/AKT3/CDKN1A
	hsa04010	MAPK signaling pathway	0.00362423	0.117788	15	SOS2/RPS6KA2/FAS/PPM1B/STK4/BRAF/PPM1A/PPP3CA/EFNA1/CSF1/TAB2/TAB2/EFNA5/AKT3/AKT3/RASGRP1/TAOK2
	hsa05161	Hepatitis B	0.00457532	0.121091	10	DDB2/SOS2/FAS/BRAF/NFATC2/PIK3CA/TAB2/TAB2/AKT3/AKT3/CDKN1A/CREB1
	hsa04211	Longevity regulating pathway	0.00465733	0.121091	7	SESN3/SESN1/IRS2/PIK3CA/PRKAA2/AKT3/AKT3/CREB1
	hsa05224	Breast cancer	0.00739739	0.153846	9	DDB2/SOS2/BRAF/NCOA1/PIK3CA/WNT9B/WNT9B/SHC1/AKT3/AKT3/CDKN1A
	hsa05215	Prostate cancer	0.0074329	0.153846	7	SOS2/BRAF/ERG/PIK3CA/AKT3/AKT3/CDKN1A/CREB1
	hsa01522	Endocrine resistance	0.00785084	0.153846	7	SOS2/NCOR1/BRAF/PIK3CA/SHC1/AKT3/AKT3/CDKN1A
	hsa05010	Alzheimer disease	0.00828403	0.153846	17	CAPN2/PSMC3/FAS/KIF5C/KIF5C/NDUFB6/GRIN2C/BRAF/COX5A/PPP3CA/MCU/IRS2/CSF1/PIK3CA/WNT9B/WNT9B/AKT3/AKT3/NDUFAB1/APH1B
	hsa04360	Axon guidance	0.0101478	0.164014	10	SEMA3C/TRPC1/PPP3CA/EFNA1/NFATC2/NEO1/PIK3CA/EFNA5/ABLIM2/ROCK1
	hsa04932	Non-alcoholic fatty liver disease	0.0103071	0.164014	9	FAS/NDUFB6/NR1H3/COX5A/IRS2/PIK3CA/PRKAA2/AKT3/AKT3/NDUFAB1
	hsa04218	Cellular senescence	0.010724	0.164014	9	CAPN2/PPP3CA/MCU/CHEK1/NFATC2/PIK3CA/E2F4/AKT3/AKT3/CDKN1A
	hsa04370	VEGF signaling pathway	0.01191	0.172034	5	SH2D2A/PPP3CA/NFATC2/PIK3CA/AKT3/AKT3
	hsa04012	ErbB signaling pathway	0.0142734	0.185311	6	SOS2/BRAF/PIK3CA/SHC1/AKT3/AKT3/CDKN1A
	hsa04910	Insulin signaling pathway	0.0147545	0.185311	8	SOS2/BRAF/IRS2/PYGL/PIK3CA/PRKAA2/SHC1/AKT3/AKT3
	hsa05210	Colorectal cancer	0.0150551	0.185311	6	DDB2/SOS2/BRAF/PIK3CA/AKT3/AKT3/CDKN1A
	hsa04668	TNF signaling pathway	0.0156802	0.185311	7	FAS/CSF1/PIK3CA/TAB2/TAB2/CX3CL1/AKT3/AKT3/CREB1
	hsa05225	Hepatocellular carcinoma	0.0167708	0.189583	9	DDB2/SOS2/SMARCD2/BRAF/PIK3CA/WNT9B/WNT9B/SHC1/AKT3/AKT3/CDKN1A
	hsa05235	PD-L1 expression and PD-1 checkpoint pathway in cancer	0.017578	0.190428	6	EML4/PPP3CA/NFATC2/PIK3CA/AKT3/AKT3/RASGRP1
AA	hsa00340	Histidine metabolism	0.000210209	0.0440901	5	ALDH2/ALDH1B1/CNDP1/ALDH7A1/ALDH3A2
	hsa00330	Arginine and proline metabolism	0.000323004	0.0440901	7	ALDH2/NOS1/ALDH1B1/CNDP1/ALDH7A1/ALDH3A2/LAP3
	hsa00380	Tryptophan metabolism	0.000698957	0.0636051	6	ALDH2/ALDH1B1/ALDH7A1/ALDH3A2/ACAT2/AOX1
	hsa00410	beta-Alanine metabolism	0.00112073	0.0653448	5	ALDH2/ALDH1B1/CNDP1/ALDH7A1/ALDH3A2
	hsa00620	Pyruvate metabolism	0.00128406	0.0653448	6	MDH2/ALDH2/ALDH1B1/ALDH7A1/ALDH3A2/ACAT2
	hsa00280	Valine, leucine and isoleucine degradation	0.00143615	0.0653448	6	ALDH2/ALDH1B1/ALDH7A1/ALDH3A2/ACAT2/AOX1
	hsa00770	Pantothenate and CoA biosynthesis	0.00189345	0.0738445	4	ALDH2/ALDH1B1/ALDH3A2/PPCDC
	hsa00561	Glycerolipid metabolism	0.00491214	0.149582	6	ALDH2/ALDH1B1/ALDH7A1/DGKD/DGKD/ALDH3A2/MGLL
	hsa00071	Fatty acid degradation	0.00493129	0.149582	5	ALDH2/ALDH1B1/ALDH7A1/ALDH3A2/ACAT2
	hsa00310	Lysine degradation	0.00575855	0.157208	6	ALDH2/ALDH1B1/ALDH7A1/KMT2C/ALDH3A2/ACAT2
	hsa00020	Citrate cycle (TCA cycle)	0.00722094	0.164276	4	MDH2/CS/SUCLG2/SDHC
	hsa00053	Ascorbate and aldarate metabolism	0.00722094	0.164276	4	ALDH2/ALDH1B1/ALDH7A1/ALDH3A2
